# Supplementary material for: Procedural Fairness and Expected Outcome Evaluations in the Public Acceptance of Sustainability Policymaking: A Case Study of Multiple Stepwise Participatory Programs to Develop an Environmental Master Plan for Sapporo, Japan
Source: MDPI journal article supplement (doi:10.3390/su14063403), 2022-03-14
Supplement: s1 [file s1]

**Table S2.** Simple tabulations with the original Japanese (2nd wave).

1. この一年の間で、第2次札幌市環境基本計画についてのニュースや話題などを目にすることはありましたか。当てはまる数字にすべて○をつけてください。

|                          | 一般繰り返し回答者<br>(47人中) | WS参加繰り返し回答者<br>(44人中) | 3回目WS参加者（初回答）<br>(29人中) |
|--------------------------|---------------------|-----------------------|-------------------------|
| 市の広報誌で見た                 | 17                  | 19                    | 15                      |
| 新聞やテレビで見た                | 6                   | 7                     | 6                       |
| インターネット（市の公式ページ）で見た      | 6                   | 4                     | 6                       |
| インターネット（市の公式ページ以外の記事）で見た | 0                   | 0                     | 0                       |
| SNS（ツイッター、Facebookなど）で見た | 0                   | 0                     | 0                       |
| 家族から聞いた                  | 0                   | 0                     | 1                       |
| 近所の方から聞いた                | 0                   | 0                     | 0                       |
| 職場の方や友人・知人から聞いた          | 2                   | 0                     | 0                       |
| その他                      | 2                   | 0                     | 4                       |
| 目にしたり聞いたりしたことはなかった       | 25                  | 21                    | 10                      |

II. 別紙、「第2次札幌市環境基本計画の概要」をご覧になってから、以下の質問にお答えください。第2次札幌市環境基本計画で描かれている目指す札幌の姿について、あなたのご意見をおうかがいします。それぞれの質問に対して、あなたの考えに最も近いと思う数字にひとつずつ○をつけてください。

|                             |                      | 全くそう<br>思わない | あまりそう<br>思わない | どちらとも<br>いえない | やや<br>そう思う   | 非常に<br>そう思う  | 合計 |
|-----------------------------|----------------------|--------------|---------------|---------------|--------------|--------------|----|
| この計画は望ましい札幌の未来像が描かれている      | 一般繰り返し回答者<br>(%)     | 1<br>(2.1)   | 5<br>(10.4)   | 10<br>(20.8)  | 15<br>(31.3) | 17<br>(35.4) | 48 |
|                             | WS参加繰り返し回答者<br>(%)   | 0<br>(0.0)   | 3<br>(6.4)    | 4<br>(8.5)    | 23<br>(48.9) | 17<br>(36.2) | 47 |
|                             | 3回目WS参加者（初回答）<br>(%) | 0<br>(0.0)   | 3<br>(10.0)   | 4<br>(13.3)   | 15<br>(50.0) | 8<br>(26.7)  | 30 |
|                             |                      |              |               |               |              |              |    |
| この計画が実現したら社会全体にとってよいことである   | 一般繰り返し回答者<br>(%)     | 2<br>(4.3)   | 1<br>(2.1)    | 9<br>(19.2)   | 18<br>(38.3) | 17<br>(36.2) | 47 |
|                             | WS参加繰り返し回答者<br>(%)   | 1<br>(2.1)   | 0<br>(0.0)    | 2<br>(4.3)    | 18<br>(38.3) | 26<br>(55.3) | 47 |
|                             | 3回目WS参加者（初回答）<br>(%) | 0<br>(0.0)   | 1<br>(3.3)    | 2<br>(6.7)    | 13<br>(43.3) | 14<br>(46.7) | 30 |
|                             |                      |              |               |               |              |              |    |
| この計画は実現可能性がある               | 一般繰り返し回答者<br>(%)     | 2<br>(4.2)   | 5<br>(10.4)   | 28<br>(58.3)  | 13<br>(27.1) | 0<br>(0.0)   | 48 |
|                             | WS参加繰り返し回答者<br>(%)   | 1<br>(2.1)   | 2<br>(4.3)    | 18<br>(38.3)  | 24<br>(51.1) | 2<br>(4.3)   | 47 |
|                             | 3回目WS参加者（初回答）<br>(%) | 0<br>(0.0)   | 7<br>(23.3)   | 11<br>(36.7)  | 9<br>(30.0)  | 3<br>(10.0)  | 30 |
|                             |                      |              |               |               |              |              |    |
| この計画は現実的である                 | 一般繰り返し回答者<br>(%)     | 1<br>(2.1)   | 13<br>(27.1)  | 24<br>(50.0)  | 10<br>(20.8) | 0<br>(0.0)   | 48 |
|                             | WS参加繰り返し回答者<br>(%)   | 3<br>(6.4)   | 2<br>(4.3)    | 19<br>(40.4)  | 21<br>(44.7) | 2<br>(4.3)   | 47 |
|                             | 3回目WS参加者（初回答）<br>(%) | 0<br>(0.0)   | 6<br>(20.0)   | 13<br>(43.3)  | 9<br>(30.0)  | 2<br>(6.7)   | 30 |
|                             |                      |              |               |               |              |              |    |
| この計画は理念だけで現実味がない            | 一般繰り返し回答者<br>(%)     | 6<br>(12.5)  | 7<br>(14.6)   | 19<br>(39.6)  | 15<br>(31.3) | 1<br>(2.1)   | 48 |
|                             | WS参加繰り返し回答者<br>(%)   | 4<br>(8.5)   | 16<br>(34.0)  | 14<br>(29.8)  | 10<br>(21.3) | 3<br>(6.4)   | 47 |
|                             | 3回目WS参加者（初回答）<br>(%) | 2<br>(6.7)   | 13<br>(43.3)  | 8<br>(26.7)   | 5<br>(16.7)  | 2<br>(6.7)   | 30 |
|                             |                      |              |               |               |              |              |    |
| この計画は理想論に過ぎず、実際には実現されない     | 一般繰り返し回答者<br>(%)     | 3<br>(6.4)   | 10<br>(21.3)  | 17<br>(36.2)  | 16<br>(34.0) | 1<br>(2.1)   | 47 |
|                             | WS参加繰り返し回答者<br>(%)   | 9<br>(19.2)  | 16<br>(34.0)  | 13<br>(27.7)  | 7<br>(14.9)  | 2<br>(4.3)   | 47 |
|                             | 3回目WS参加者（初回答）<br>(%) | 5<br>(16.7)  | 11<br>(36.7)  | 10<br>(33.3)  | 2<br>(6.7)   | 2<br>(6.7)   | 30 |
|                             |                      |              |               |               |              |              |    |
| 多くの市民がこの計画を共有すれば、実現可能性が高まる  | 一般繰り返し回答者<br>(%)     | 1<br>(2.1)   | 5<br>(10.4)   | 5<br>(10.4)   | 29<br>(60.4) | 8<br>(16.7)  | 48 |
|                             | WS参加繰り返し回答者<br>(%)   | 0<br>(0.0)   | 3<br>(6.4)    | 3<br>(6.4)    | 29<br>(61.7) | 12<br>(25.5) | 47 |
|                             | 3回目WS参加者（初回答）<br>(%) | 2<br>(6.7)   | 2<br>(6.7)    | 3<br>(10.0)   | 15<br>(50.0) | 8<br>(26.7)  | 30 |
|                             |                      |              |               |               |              |              |    |
| 多くの市民がこの計画を共有すれば、目標が達成可能である | 一般繰り返し回答者<br>(%)     | 2<br>(4.2)   | 6<br>(12.5)   | 7<br>(14.6)   | 27<br>(56.3) | 6<br>(12.5)  | 48 |
|                             | WS参加繰り返し回答者<br>(%)   | 1<br>(2.1)   | 3<br>(6.4)    | 6<br>(12.8)   | 29<br>(61.7) | 8<br>(17.0)  | 47 |
|                             | 3回目WS参加者（初回答）<br>(%) | 1<br>(3.3)   | 3<br>(10.0)   | 4<br>(13.3)   | 15<br>(50.0) | 7<br>(23.3)  | 30 |
|                             |                      |              |               |               |              |              |    |
| この計画を知ったとしても、多くの市民は無関心だろう   | 一般繰り返し回答者<br>(%)     | 0<br>(0.0)   | 7<br>(14.6)   | 14<br>(29.2)  | 19<br>(39.6) | 8<br>(16.7)  | 48 |
|                             | WS参加繰り返し回答者<br>(%)   | 2<br>(4.3)   | 11<br>(23.4)  | 16<br>(34.0)  | 14<br>(29.8) | 4<br>(8.5)   | 47 |
|                             | 3回目WS参加者（初回答）<br>(%) | 1<br>(3.3)   | 5<br>(16.7)   | 11<br>(36.7)  | 10<br>(33.3) | 3<br>(10.0)  | 30 |
|                             |                      |              |               |               |              |              |    |
|                             | 一般繰り返し回答者<br>(%)     | 0<br>(0.0)   | 8<br>(16.7)   | 13<br>(27.1)  | 20<br>(41.7) | 7<br>(14.6)  | 48 |

|                                |               |       |        |        |        |        |    |
|--------------------------------|---------------|-------|--------|--------|--------|--------|----|
| この計画を知ったとしても、多くの市民の行動は変わらないだろう | WS参加繰り返し回答者   | 2     | 11     | 20     | 11     | 3      | 47 |
|                                | (%)           | (4.3) | (23.4) | (42.6) | (23.4) | (6.4)  |    |
|                                | 3回目WS参加者（初回答） | 1     | 10     | 9      | 8      | 2      | 30 |
|                                | (%)           | (3.3) | (33.3) | (30.0) | (26.7) | (6.7)  |    |
| 全体として、この計画は札幌市全体に<br>よい結果をもたらす | 一般繰り返し回答者     | 1     | 7      | 9      | 21     | 10     | 48 |
|                                | (%)           | (2.1) | (14.6) | (18.8) | (43.8) | (20.8) |    |
|                                | WS参加繰り返し回答者   | 0     | 1      | 9      | 25     | 12     | 47 |
|                                | (%)           | (0.0) | (2.1)  | (19.2) | (53.2) | (25.5) |    |
|                                | 3回目WS参加者（初回答） | 0     | 2      | 4      | 16     | 8      | 30 |
|                                | (%)           | (0.0) | (6.7)  | (13.3) | (53.3) | (26.7) |    |
| 全体として、この計画はよいものだと<br>評価できる     | 一般繰り返し回答者     | 2     | 3      | 10     | 26     | 7      | 48 |
|                                | (%)           | (4.2) | (6.3)  | (20.8) | (54.2) | (14.6) |    |
|                                | WS参加繰り返し回答者   | 0     | 2      | 3      | 26     | 16     | 47 |
|                                | (%)           | (0.0) | (4.3)  | (6.4)  | (55.3) | (34.0) |    |
|                                | 3回目WS参加者（初回答） | 0     | 2      | 2      | 18     | 8      | 30 |
|                                | (%)           | (0.0) | (6.7)  | (6.7)  | (60.0) | (26.7) |    |

Ⅲ、第2次札幌市環境基本計画策定に際して行われた、市民の意見をおうかがいする機会についておうかがいします。

A、計画策定に際して、2017年12月にも市民ワークショップを行ったことをあなたはご存じでしたか。当てはまる数字ひとつに○をつけてください。

|                                                                                |                      | まったく聞<br>いたことが<br>ない | ほとんど聞<br>いたことが<br>ない | 少し聞いた<br>ことがある | 聞いたこと<br>がある | 聞いたこと<br>がありよく<br>知っている | 合計 |
|--------------------------------------------------------------------------------|----------------------|----------------------|----------------------|----------------|--------------|-------------------------|----|
| q3_a( A、計画策定に際して、2017年12月にも市民ワークショップを行ったことをあなたはご存じでしたか。当てはまる数字ひとつに○をつけてください。 ) | 一般繰り返し回答者<br>(%)     | 26<br>(55.3)         | 14<br>(29.8)         | 4<br>(8.5)     | 3<br>(6.4)   | 0<br>(0.0)              | 47 |
|                                                                                | WS参加繰り返し回答者<br>(%)   | 13<br>(28.3)         | 8<br>(17.4)          | 2<br>(4.4)     | 12<br>(26.1) | 11<br>(23.9)            | 46 |
|                                                                                | 3回目WS参加者（初回答）<br>(%) | 8<br>(26.7)          | 5<br>(16.7)          | 5<br>(16.7)    | 4<br>(13.3)  | 8<br>(26.7)             | 30 |

B、計画策定に際して、パブリックコメントやキッズコメントを行っていたことをあなたはご存じでしたか。当てはまる数字ひとつに○をつけてください。

|                                                                                |                      | まったく聞<br>いたことが<br>ない | ほとんど聞<br>いたことが<br>ない | 少し聞いた<br>ことがある | 聞いたこと<br>がある | 聞いたこと<br>がありよく<br>知っている | 合計 |
|--------------------------------------------------------------------------------|----------------------|----------------------|----------------------|----------------|--------------|-------------------------|----|
| q3_b( B、計画策定に際して、パブリックコメントやキッズコメントを行っていたことをあなたはご存じでしたか。当てはまる数字ひとつに○をつけてください。 ) | 一般繰り返し回答者<br>(%)     | 26<br>(55.3)         | 15<br>(31.9)         | 4<br>(8.5)     | 2<br>(4.3)   | 0<br>(0.0)              | 47 |
|                                                                                | WS参加繰り返し回答者<br>(%)   | 14<br>(30.4)         | 9<br>(19.6)          | 10<br>(21.7)   | 10<br>(21.7) | 3<br>(6.5)              | 46 |
|                                                                                | 3回目WS参加者（初回答）<br>(%) | 7<br>(23.3)          | 5<br>(16.7)          | 8<br>(26.7)    | 5<br>(16.7)  | 5<br>(16.7)             | 30 |

C. 別紙、「第2次札幌市環境基本計画策定に向けた市民意見反映のプロセス」をご覧になってから以下の質問にお答えください。環境基本計画策定に際して、市民の声を聴き、反映させていくプロセスについて、あなたのご意見をおうかがいします。それぞれの質問に対して、あなたの考えに最も近いと思う数字にひとつずつ○をつけてください。

|                                                 |                      | 全くそう<br>思わない | あまりそう<br>思わない | どちらとも<br>いえない | やや<br>そう思う   | 非常に<br>そう思う | 合計 |
|-------------------------------------------------|----------------------|--------------|---------------|---------------|--------------|-------------|----|
| 市は市民に十分な情報発信・情報開示<br>をしている                      | 一般繰り返し回答者<br>(%)     | 4<br>(8.5)   | 21<br>(44.7)  | 14<br>(29.8)  | 7<br>(14.9)  | 1<br>(2.1)  | 47 |
|                                                 | WS参加繰り返し回答者<br>(%)   | 2<br>(4.3)   | 19<br>(40.4)  | 13<br>(27.7)  | 11<br>(23.4) | 2<br>(4.3)  | 47 |
|                                                 | 3回目WS参加者（初回答）<br>(%) | 1<br>(3.3)   | 11<br>(36.7)  | 6<br>(20.0)   | 9<br>(30.0)  | 3<br>(10.0) | 30 |
| 市は市民にわかりやすい説明をしてい<br>る                          | 一般繰り返し回答者<br>(%)     | 5<br>(10.6)  | 21<br>(44.7)  | 15<br>(31.9)  | 6<br>(12.8)  | 0<br>(0.0)  | 47 |
|                                                 | WS参加繰り返し回答者<br>(%)   | 2<br>(4.3)   | 19<br>(40.4)  | 11<br>(23.4)  | 13<br>(27.7) | 2<br>(4.3)  | 47 |
|                                                 | 3回目WS参加者（初回答）<br>(%) | 3<br>(10.0)  | 11<br>(36.7)  | 6<br>(20.0)   | 9<br>(30.0)  | 1<br>(3.3)  | 30 |
| 計画策定にあたり市民が参加できる機<br>会が開かれている                   | 一般繰り返し回答者<br>(%)     | 5<br>(10.6)  | 12<br>(25.5)  | 19<br>(40.4)  | 11<br>(23.4) | 0<br>(0.0)  | 47 |
|                                                 | WS参加繰り返し回答者<br>(%)   | 0<br>(0.0)   | 10<br>(21.3)  | 14<br>(29.8)  | 19<br>(40.4) | 4<br>(8.5)  | 47 |
|                                                 | 3回目WS参加者（初回答）<br>(%) | 1<br>(3.3)   | 8<br>(26.7)   | 7<br>(23.3)   | 13<br>(43.3) | 1<br>(3.3)  | 30 |
| 計画策定にあたり市民が意見を述べる<br>機会が十分にある                   | 一般繰り返し回答者<br>(%)     | 5<br>(10.9)  | 19<br>(41.3)  | 16<br>(34.8)  | 6<br>(13.0)  | 0<br>(0.0)  | 46 |
|                                                 | WS参加繰り返し回答者<br>(%)   | 0<br>(0.0)   | 17<br>(36.2)  | 13<br>(27.7)  | 15<br>(31.9) | 2<br>(4.3)  | 47 |
|                                                 | 3回目WS参加者（初回答）<br>(%) | 2<br>(6.7)   | 10<br>(33.3)  | 5<br>(16.7)   | 12<br>(40.0) | 1<br>(3.3)  | 30 |
| 市民ワークショップ参加者の中には、<br>自分と似た考えをもつ人もいたろう           | 一般繰り返し回答者<br>(%)     | 2<br>(4.3)   | 4<br>(8.5)    | 19<br>(40.4)  | 20<br>(42.6) | 2<br>(4.3)  | 47 |
|                                                 | WS参加繰り返し回答者<br>(%)   | 0<br>(0.0)   | 2<br>(4.3)    | 10<br>(21.3)  | 27<br>(57.5) | 8<br>(17.0) | 47 |
|                                                 | 3回目WS参加者（初回答）<br>(%) | 0<br>(0.0)   | 1<br>(3.3)    | 3<br>(10.0)   | 19<br>(63.3) | 7<br>(23.3) | 30 |
| 市民ワークショップの参加者は、自分<br>と似た立場の人もいたろう               | 一般繰り返し回答者<br>(%)     | 2<br>(4.3)   | 4<br>(8.5)    | 19<br>(40.4)  | 20<br>(42.6) | 2<br>(4.3)  | 47 |
|                                                 | WS参加繰り返し回答者<br>(%)   | 0<br>(0.0)   | 4<br>(8.5)    | 10<br>(21.3)  | 26<br>(55.3) | 7<br>(14.9) | 47 |
|                                                 | 3回目WS参加者（初回答）<br>(%) | 0<br>(0.0)   | 3<br>(10.0)   | 5<br>(16.7)   | 16<br>(53.3) | 6<br>(20.0) | 30 |
| ワークショップに来るような人は関心<br>の高い人だけで、市民全体の意見とは<br>いえない  | 一般繰り返し回答者<br>(%)     | 2<br>(4.2)   | 3<br>(6.3)    | 14<br>(29.2)  | 20<br>(41.7) | 9<br>(18.8) | 48 |
|                                                 | WS参加繰り返し回答者<br>(%)   | 2<br>(4.3)   | 12<br>(25.5)  | 11<br>(23.4)  | 16<br>(34.0) | 6<br>(12.8) | 47 |
|                                                 | 3回目WS参加者（初回答）<br>(%) | 0<br>(0.0)   | 4<br>(13.3)   | 7<br>(23.3)   | 13<br>(43.3) | 6<br>(20.0) | 30 |
| 市民ワークショップの参加者は各回100<br>名にも満たず、市民全体の意見とはい<br>えない | 一般繰り返し回答者<br>(%)     | 1<br>(2.1)   | 8<br>(16.7)   | 10<br>(20.8)  | 20<br>(41.7) | 9<br>(18.8) | 48 |
|                                                 | WS参加繰り返し回答者<br>(%)   | 4<br>(8.5)   | 12<br>(25.5)  | 10<br>(21.3)  | 17<br>(36.2) | 4<br>(8.5)  | 47 |
|                                                 | 3回目WS参加者（初回答）<br>(%) | 0<br>(0.0)   | 3<br>(10.0)   | 9<br>(30.0)   | 10<br>(33.3) | 8<br>(26.7) | 30 |
| 市民ワークショップで出された意見<br>は、多様な価値が含まれていただろう           | 一般繰り返し回答者<br>(%)     | 1<br>(2.1)   | 6<br>(12.5)   | 24<br>(50.0)  | 16<br>(33.3) | 1<br>(2.1)  | 48 |
|                                                 | WS参加繰り返し回答者<br>(%)   | 0<br>(0.0)   | 4<br>(8.5)    | 10<br>(21.3)  | 27<br>(57.5) | 6<br>(12.8) | 47 |
|                                                 | 3回目WS参加者（初回答）<br>(%) | 1<br>(3.3)   | 1<br>(3.3)    | 5<br>(16.7)   | 16<br>(53.3) | 7<br>(23.3) | 30 |
|                                                 | 一般繰り返し回答者<br>(%)     | 2<br>(4.3)   | 5<br>(10.6)   | 27<br>(57.5)  | 12<br>(25.5) | 1<br>(2.1)  | 47 |

|                                     |               |       |        |        |        |        |    |
|-------------------------------------|---------------|-------|--------|--------|--------|--------|----|
| 市民ワークショップでは、少数の意見も尊重されただろう          | WS参加繰り返し回答者   | 2     | 9      | 14     | 17     | 5      | 47 |
|                                     | (%)           | (4.3) | (19.2) | (29.8) | (36.2) | (10.6) |    |
|                                     | 3回目WS参加者（初回答） | 1     | 3      | 5      | 14     | 7      | 30 |
|                                     | (%)           | (3.3) | (10.0) | (16.7) | (46.7) | (23.3) |    |
|                                     | 一般繰り返し回答者     | 0     | 6      | 30     | 11     | 0      | 47 |
|                                     | (%)           | (0.0) | (12.8) | (63.8) | (23.4) | (0.0)  |    |
| 市民ワークショップで出された意見が基本計画に反映されているだろう    | WS参加繰り返し回答者   | 1     | 2      | 15     | 25     | 4      | 47 |
|                                     | (%)           | (2.1) | (4.3)  | (31.9) | (53.2) | (8.5)  |    |
|                                     | 3回目WS参加者（初回答） | 2     | 5      | 10     | 10     | 3      | 30 |
|                                     | (%)           | (6.7) | (16.7) | (33.3) | (33.3) | (10.0) |    |
|                                     | 一般繰り返し回答者     | 2     | 5      | 26     | 14     | 0      | 47 |
|                                     | (%)           | (4.3) | (10.6) | (55.3) | (29.8) | (0.0)  |    |
| この計画には、市民ワークショップで出された意見が踏まえられているだろう | WS参加繰り返し回答者   | 1     | 2      | 13     | 24     | 7      | 47 |
|                                     | (%)           | (2.1) | (4.3)  | (27.7) | (51.1) | (14.9) |    |
|                                     | 3回目WS参加者（初回答） | 0     | 5      | 9      | 12     | 3      | 29 |
|                                     | (%)           | (0.0) | (17.2) | (31.0) | (41.4) | (10.3) |    |
|                                     | 一般繰り返し回答者     | 3     | 4      | 27     | 11     | 2      | 47 |
|                                     | (%)           | (6.4) | (8.5)  | (57.5) | (23.4) | (4.3)  |    |
| 全体として、計画策定に際し、公正な過程を経ている            | WS参加繰り返し回答者   | 1     | 1      | 10     | 25     | 10     | 47 |
|                                     | (%)           | (2.1) | (2.1)  | (21.3) | (53.2) | (21.3) |    |
|                                     | 3回目WS参加者（初回答） | 0     | 2      | 9      | 12     | 6      | 29 |
|                                     | (%)           | (0.0) | (6.9)  | (31.0) | (41.4) | (20.7) |    |
|                                     | 一般繰り返し回答者     | 3     | 4      | 28     | 10     | 2      | 47 |
|                                     | (%)           | (6.4) | (8.5)  | (59.6) | (21.3) | (4.3)  |    |
| 全体として、市民参加の方法や計画策定の進め方は公正だった        | WS参加繰り返し回答者   | 1     | 1      | 10     | 23     | 12     | 47 |
|                                     | (%)           | (2.1) | (2.1)  | (21.3) | (48.9) | (25.5) |    |
|                                     | 3回目WS参加者（初回答） | 0     | 3      | 11     | 11     | 5      | 30 |
|                                     | (%)           | (0.0) | (10.0) | (36.7) | (36.7) | (16.7) |    |

D. ワークショップへ参加されたことがある方へおうかがいします。ワークショップへ参加されたときに、どのように感じましたか。それぞれの質問に対して、あなたの考えに最も近いと思う数字にひとつずつ○をつけてください。

|                                                                     |               | 全くそう<br>思わない | あまりそう<br>思わない | どちらとも<br>いえない | やや<br>そう思う | 非常に<br>そう思う | 合計 |
|---------------------------------------------------------------------|---------------|--------------|---------------|---------------|------------|-------------|----|
| ワークショップ参加者の間で、札幌の<br>未来像が共有された                                      | WS参加繰り返し回答者   | 1            | 4             | 6             | 29         | 6           | 46 |
|                                                                     | (%)           | (2.2)        | (8.7)         | (13.0)        | (63.0)     | (13.0)      |    |
|                                                                     | 3回目WS参加者（初回答） | 1            | 3             | 9             | 14         | 4           | 31 |
|                                                                     | (%)           | (3.2)        | (9.7)         | (29.0)        | (45.2)     | (12.9)      |    |
| ワークショップ参加者は、札幌市が目<br>指す目標を共有できた                                     | WS参加繰り返し回答者   | 0            | 4             | 9             | 26         | 7           | 46 |
|                                                                     | (%)           | (0.0)        | (8.7)         | (19.6)        | (56.5)     | (15.2)      |    |
|                                                                     | 3回目WS参加者（初回答） | 1            | 3             | 7             | 14         | 5           | 30 |
|                                                                     | (%)           | (3.3)        | (10.0)        | (23.3)        | (46.7)     | (16.7)      |    |
| 2050年の未来像と言われても、あまり<br>にも遠い将来のことでイメージがわか<br>ず議論しにくかった               | WS参加繰り返し回答者   | 2            | 17            | 7             | 16         | 4           | 46 |
|                                                                     | (%)           | (4.4)        | (37.0)        | (15.2)        | (34.8)     | (8.7)       |    |
|                                                                     | 3回目WS参加者（初回答） | 0            | 9             | 5             | 12         | 5           | 31 |
|                                                                     | (%)           | (0.0)        | (29.0)        | (16.1)        | (38.7)     | (16.1)      |    |
| はじめに未来像をイメージし、そこか<br>ら逆算して取り組みを考えることは、<br>重要な考え方だと思う                | WS参加繰り返し回答者   | 0            | 1             | 3             | 25         | 17          | 46 |
|                                                                     | (%)           | (0.0)        | (2.2)         | (6.5)         | (54.4)     | (37.0)      |    |
|                                                                     | 3回目WS参加者（初回答） | 0            | 2             | 3             | 12         | 13          | 30 |
|                                                                     | (%)           | (0.0)        | (6.7)         | (10.0)        | (40.0)     | (43.3)      |    |
| はじめに未来像をイメージし、そこか<br>ら逆算して取り組みを考えるよりも、<br>目先の問題から考えていったほうがよ<br>いと思う | WS参加繰り返し回答者   | 5            | 12            | 21            | 7          | 1           | 46 |
|                                                                     | (%)           | (10.9)       | (26.1)        | (45.7)        | (15.2)     | (2.2)       |    |
|                                                                     | 3回目WS参加者（初回答） | 0            | 10            | 10            | 5          | 5           | 30 |
|                                                                     | (%)           | (0.0)        | (33.3)        | (33.3)        | (16.7)     | (16.7)      |    |
| ワークショップでは、札幌の環境につ<br>いての議論を通じて環境問題について<br>深く考えることができた               | WS参加繰り返し回答者   | 0            | 2             | 4             | 26         | 13          | 45 |
|                                                                     | (%)           | (0.0)        | (4.4)         | (8.9)         | (57.8)     | (28.9)      |    |
|                                                                     | 3回目WS参加者（初回答） | 0            | 1             | 3             | 13         | 14          | 31 |
|                                                                     | (%)           | (0.0)        | (3.2)         | (9.7)         | (41.9)     | (45.2)      |    |
| ワークショップに参加したことで、私<br>にとって得るものがあった                                   | WS参加繰り返し回答者   | 0            | 0             | 1             | 29         | 16          | 46 |
|                                                                     | (%)           | (0.0)        | (0.0)         | (2.2)         | (63.0)     | (34.8)      |    |
|                                                                     | 3回目WS参加者（初回答） | 0            | 0             | 3             | 14         | 14          | 31 |
|                                                                     | (%)           | (0.0)        | (0.0)         | (9.7)         | (45.2)     | (45.2)      |    |
| ワークショップに参加したことで、私<br>も計画づくりに影響を及ぼせた                                 | WS参加繰り返し回答者   | 2            | 3             | 15            | 20         | 6           | 46 |
|                                                                     | (%)           | (4.4)        | (6.5)         | (32.6)        | (43.5)     | (13.0)      |    |
|                                                                     | 3回目WS参加者（初回答） | 2            | 7             | 11            | 8          | 3           | 31 |
|                                                                     | (%)           | (6.5)        | (22.6)        | (35.5)        | (25.8)     | (9.7)       |    |
| 私は、この計画づくりに貢献できた                                                    | WS参加繰り返し回答者   | 1            | 4             | 23            | 17         | 1           | 46 |
|                                                                     | (%)           | (2.2)        | (8.7)         | (50.0)        | (37.0)     | (2.2)       |    |
|                                                                     | 3回目WS参加者（初回答） | 0            | 6             | 15            | 9          | 1           | 31 |
|                                                                     | (%)           | (0.0)        | (19.4)        | (48.4)        | (29.0)     | (3.2)       |    |

Ⅳ、第2次札幌市環境基本計画の内容と、計画を作るまでの進め方をあわせた全体的なことについておうかがいします。それぞれの質問に対して、あなたの考えに最も近いと思う数字にひとつずつ○をつけてください。

|                                             |               | 全くそう<br>思わない | あまりそう<br>思わない | どちらとも<br>いえない | やや<br>そう思う | 非常に<br>そう思う | 合計 |
|---------------------------------------------|---------------|--------------|---------------|---------------|------------|-------------|----|
| 計画とワークショップでの議論は、すべての市民に共通に目指すべき未来像を提供している   | 一般繰り返し回答者     | 5            | 10            | 17            | 13         | 2           | 47 |
|                                             | (%)           | (10.6)       | (21.3)        | (36.2)        | (27.7)     | (4.3)       |    |
|                                             | WS参加繰り返し回答者   | 0            | 5             | 11            | 26         | 4           | 46 |
|                                             | (%)           | (0.0)        | (10.9)        | (23.9)        | (56.5)     | (8.7)       |    |
|                                             | 3回目WS参加者（初回答） | 1            | 3             | 6             | 16         | 5           | 31 |
|                                             | (%)           | (3.2)        | (9.7)         | (19.4)        | (51.6)     | (16.1)      |    |
| 計画とワークショップでの議論は、多様な価値とすべての市民に共通の目標がふまえられている | 一般繰り返し回答者     | 4            | 11            | 17            | 13         | 2           | 47 |
|                                             | (%)           | (8.5)        | (23.4)        | (36.2)        | (27.7)     | (4.3)       |    |
|                                             | WS参加繰り返し回答者   | 1            | 6             | 10            | 24         | 5           | 46 |
|                                             | (%)           | (2.2)        | (13.0)        | (21.7)        | (52.2)     | (10.9)      |    |
|                                             | 3回目WS参加者（初回答） | 0            | 2             | 11            | 13         | 4           | 30 |
|                                             | (%)           | (0.0)        | (6.7)         | (36.7)        | (43.3)     | (13.3)      |    |
| 私は、計画に描かれている札幌の未来像を支持できる                    | 一般繰り返し回答者     | 1            | 9             | 7             | 25         | 6           | 48 |
|                                             | (%)           | (2.1)        | (18.8)        | (14.6)        | (52.1)     | (12.5)      |    |
|                                             | WS参加繰り返し回答者   | 0            | 1             | 7             | 25         | 13          | 46 |
|                                             | (%)           | (0.0)        | (2.2)         | (15.2)        | (54.4)     | (28.3)      |    |
|                                             | 3回目WS参加者（初回答） | 0            | 2             | 7             | 14         | 8           | 31 |
|                                             | (%)           | (0.0)        | (6.5)         | (22.6)        | (45.2)     | (25.8)      |    |
| 私は、計画に描かれている札幌の未来像を目指すべきだと思う                | 一般繰り返し回答者     | 1            | 7             | 9             | 22         | 9           | 48 |
|                                             | (%)           | (2.1)        | (14.6)        | (18.8)        | (45.8)     | (18.8)      |    |
|                                             | WS参加繰り返し回答者   | 0            | 0             | 6             | 24         | 16          | 46 |
|                                             | (%)           | (0.0)        | (0.0)         | (13.0)        | (52.2)     | (34.8)      |    |
|                                             | 3回目WS参加者（初回答） | 0            | 2             | 5             | 15         | 9           | 31 |
|                                             | (%)           | (0.0)        | (6.5)         | (16.1)        | (48.4)     | (29.0)      |    |
| 多くの市民は、計画に描かれている札幌の未来像を支持できるだろう             | 一般繰り返し回答者     | 1            | 6             | 23            | 18         | 0           | 48 |
|                                             | (%)           | (2.1)        | (12.5)        | (47.9)        | (37.5)     | (0.0)       |    |
|                                             | WS参加繰り返し回答者   | 0            | 3             | 17            | 24         | 2           | 46 |
|                                             | (%)           | (0.0)        | (6.5)         | (37.0)        | (52.2)     | (4.4)       |    |
|                                             | 3回目WS参加者（初回答） | 0            | 4             | 13            | 12         | 2           | 31 |
|                                             | (%)           | (0.0)        | (12.9)        | (41.9)        | (38.7)     | (6.5)       |    |
| 多くの市民は、計画に描かれている札幌の未来像を目指すべきだと思うだろう         | 一般繰り返し回答者     | 1            | 5             | 22            | 20         | 0           | 48 |
|                                             | (%)           | (2.1)        | (10.4)        | (45.8)        | (41.7)     | (0.0)       |    |
|                                             | WS参加繰り返し回答者   | 1            | 4             | 11            | 26         | 4           | 46 |
|                                             | (%)           | (2.2)        | (8.7)         | (23.9)        | (56.5)     | (8.7)       |    |
|                                             | 3回目WS参加者（初回答） | 0            | 3             | 11            | 13         | 4           | 31 |
|                                             | (%)           | (0.0)        | (9.7)         | (35.5)        | (41.9)     | (12.9)      |    |
| 私は、計画をつくるまでの進め方も含め、計画に納得できる                 | 一般繰り返し回答者     | 3            | 4             | 21            | 19         | 1           | 48 |
|                                             | (%)           | (6.3)        | (8.3)         | (43.8)        | (39.6)     | (2.1)       |    |
|                                             | WS参加繰り返し回答者   | 1            | 1             | 9             | 24         | 11          | 46 |
|                                             | (%)           | (2.2)        | (2.2)         | (19.6)        | (52.2)     | (23.9)      |    |
|                                             | 3回目WS参加者（初回答） | 1            | 4             | 6             | 18         | 2           | 31 |
|                                             | (%)           | (3.2)        | (12.9)        | (19.4)        | (58.1)     | (6.5)       |    |
| 私は、計画をつくるまでの進め方も含め、計画を受け入れられる               | 一般繰り返し回答者     | 3            | 6             | 16            | 20         | 2           | 47 |
|                                             | (%)           | (6.4)        | (12.8)        | (34.0)        | (42.6)     | (4.3)       |    |
|                                             | WS参加繰り返し回答者   | 1            | 3             | 5             | 25         | 12          | 46 |
|                                             | (%)           | (2.2)        | (6.5)         | (10.9)        | (54.4)     | (26.1)      |    |
|                                             | 3回目WS参加者（初回答） | 0            | 2             | 7             | 19         | 3           | 31 |
|                                             | (%)           | (0.0)        | (6.5)         | (22.6)        | (61.3)     | (9.7)       |    |
| 計画に描かれている札幌の未来像は、このままでは多くの市民が共有できないだろう      | 一般繰り返し回答者     | 3            | 11            | 18            | 11         | 5           | 48 |
|                                             | (%)           | (6.3)        | (22.9)        | (37.5)        | (22.9)     | (10.4)      |    |
|                                             | WS参加繰り返し回答者   | 0            | 15            | 15            | 12         | 4           | 46 |
|                                             | (%)           | (0.0)        | (32.6)        | (32.6)        | (26.1)     | (8.7)       |    |
|                                             | 3回目WS参加者（初回答） | 1            | 6             | 11            | 9          | 4           | 31 |
|                                             | (%)           | (3.2)        | (19.4)        | (35.5)        | (29.0)     | (12.9)      |    |
| 市民が計画に描かれている札幌の未来                           | 一般繰り返し回答者     | 1            | 0             | 6             | 20         | 21          | 48 |
|                                             | (%)           | (2.1)        | (0.0)         | (12.5)        | (41.7)     | (43.8)      |    |



|                                                       |               |       |        |        |        |        |    |
|-------------------------------------------------------|---------------|-------|--------|--------|--------|--------|----|
| 市民が計画に加わっているワークショップの<br>像を共有できるよう、市はもっと情報<br>発信すべきである | WS参加繰り返し回答者   | 0     | 0      | 1      | 21     | 24     | 46 |
|                                                       | (%)           | (0.0) | (0.0)  | (2.2)  | (45.7) | (52.2) |    |
|                                                       | 3回目WS参加者（初回答） | 0     | 1      | 1      | 10     | 19     | 31 |
|                                                       | (%)           | (0.0) | (3.2)  | (3.2)  | (32.3) | (61.3) |    |
| 計画策定後も、市民が参加できる場を<br>広げるべきである                         | 一般繰り返し回答者     | 1     | 0      | 6      | 23     | 18     | 48 |
|                                                       | (%)           | (2.1) | (0.0)  | (12.5) | (47.9) | (37.5) |    |
|                                                       | WS参加繰り返し回答者   | 0     | 1      | 2      | 20     | 23     | 46 |
|                                                       | (%)           | (0.0) | (2.2)  | (4.4)  | (43.5) | (50.0) |    |
|                                                       | 3回目WS参加者（初回答） | 0     | 0      | 2      | 11     | 18     | 31 |
|                                                       | (%)           | (0.0) | (0.0)  | (6.5)  | (35.5) | (58.1) |    |
| 機会があったら私もワークショップに<br>参加したい                            | 一般繰り返し回答者     | 3     | 6      | 22     | 10     | 7      | 48 |
|                                                       | (%)           | (6.3) | (12.5) | (45.8) | (20.8) | (14.6) |    |
|                                                       | WS参加繰り返し回答者   | 0     | 0      | 8      | 20     | 18     | 46 |
|                                                       | (%)           | (0.0) | (0.0)  | (17.4) | (43.5) | (39.1) |    |
|                                                       | 3回目WS参加者（初回答） | 0     | 0      | 5      | 14     | 12     | 31 |
|                                                       | (%)           | (0.0) | (0.0)  | (16.1) | (45.2) | (38.7) |    |

V. あなた自身の日常的なお付き合いや地域での活動などについてお尋ねします。

A. あなたは次のような地域・コミュニティでの活動やイベントに参加したことがありますか。あてはまる数字にすべて○をつけてください。

|                                     | 一般繰り返し回答者<br>(47人中) | WS参加繰り返し回答者<br>(44人中) | 3回目WS参加者（初回答）<br>(29人中) |
|-------------------------------------|---------------------|-----------------------|-------------------------|
| お祭り（公園や神社などで開かれる小規模なもの）             | 29                  | 32                    | 21                      |
| 防犯・防災活動                             | 12                  | 14                    | 10                      |
| 花植えや花壇づくりなど                         | 8                   | 13                    | 6                       |
| 集団資源回収活動やごみ拾いなど                     | 19                  | 20                    | 15                      |
| 町内会、老人会、婦人会、子ども会などが開くバザーなどのイベントや交流会 | 15                  | 21                    | 17                      |
| 町内会などの組織を運用するための定期的な会合              | 11                  | 16                    | 8                       |
| その他                                 | 0                   | 5                     | 2                       |
| 何も参加したことがない                         | 9                   | 4                     | 4                       |

B. 地域・コミュニティにかかわらず、あなたは次のような活動に参加することがありますか。当てはまる数字にすべて○をつけてください。

|                                                          | 一般繰り返し回答者<br>(46人中) | WS参加繰り返し回答者<br>(46人中) | 3回目WS参加者（初回答）<br>(31人中) |
|----------------------------------------------------------|---------------------|-----------------------|-------------------------|
| 子育てに関する交流（親同士のお茶飲みや育児相談など）                               | 11                  | 4                     | 11                      |
| P T A や放課後の課外活動などの学校関連の活動                                | 12                  | 10                    | 7                       |
| 福祉や介護に関する相談や集まり（デイケアやピアサポートなど）                           | 7                   | 12                    | 7                       |
| 環境問題について考える活動や勉強会（生ごみの堆肥化やリユース・リサイクルといった取り組みに関する講習会や集まり） | 5                   | 10                    | 8                       |
| 趣味の活動（音楽や絵画、囲碁・将棋、華道・茶道、スポーツなど）                          | 18                  | 28                    | 19                      |
| ペットを飼っている人同士の集まり                                         | 1                   | 2                     | 1                       |
| その他                                                      | 2                   | 7                     | 3                       |
| 何も参加していない                                                | 15                  | 8                     | 8                       |

VI. 現在のあなたが取り組んでいるふだんの環境保全行動についておうかがいします。あなたは次のような行動をふだんからしていますか。  
あてはまる数字にすべて○をつけてください。

|                                                            | 一般繰り返し回答者<br>(48人中) | WS参加繰り返し回答者<br>(47人中) | 3回目WS参加者（初回答）<br>(31人中) |
|------------------------------------------------------------|---------------------|-----------------------|-------------------------|
| 使用済み油や調理くずなどを下水に流さずに処理している                                 | 32                  | 38                    | 23                      |
| 家の庭やベランダなどで植物を育てている                                        | 24                  | 32                    | 19                      |
| 食材や日用品は無駄なく使い切る                                            | 28                  | 39                    | 25                      |
| 割り箸を使わないようにしている                                            | 20                  | 19                    | 18                      |
| レジ袋を辞退している                                                 | 35                  | 31                    | 25                      |
| 普段使用する日用品や服などは、なるべく手入れや修理をしながら大切に使っている                     | 27                  | 33                    | 18                      |
| 日用品や服などは、再利用したり、リサイクルショップへ売ったりしている                         | 28                  | 26                    | 23                      |
| ごみの分別区分やごみを出す曜日を守っている                                      | 46                  | 46                    | 30                      |
| 使用していない部屋の照明や家電製品などは切るようにしている                              | 42                  | 44                    | 29                      |
| 不要な待機電力を減らすため、使っていない家電製品のコンセントを抜くようにしている                   | 28                  | 26                    | 19                      |
| 夏場の冷房温度は28℃程度（26～30℃）、冬場の暖房温度は20℃程度（18～22℃）を目安に設定している      | 24                  | 27                    | 17                      |
| 北海道産の食材を積極的に選ぶようにしている                                      | 31                  | 35                    | 19                      |
| 季節に応じた旬の食材を選ぶようにしている                                       | 29                  | 32                    | 19                      |
| 日用品を購入する際は、エコマークなどの環境ラベルがついているものを選ぶようにしている                 | 6                   | 13                    | 7                       |
| 家電や自動車を購入する際は、環境に配慮した機能があるものを選ぶようにしている                     | 20                  | 26                    | 12                      |
| 環境問題に熱心に取り組んでいる生産者や販売店の商品を選ぶようにしている                        | 9                   | 10                    | 4                       |
| 徒歩や自転車で行ける範囲の移動は、自動車の利用を控えている                              | 25                  | 32                    | 23                      |
| 電車やバスなどの公共交通を積極的に利用している                                    | 23                  | 34                    | 20                      |
| 自動車を運転する際は、アクセルをゆっくり踏んだり、アイドリングストップを行ったりするなど、エコドライブを実践している | 27                  | 25                    | 12                      |
| 古紙などの集団資源回収活動に参加している                                       | 34                  | 37                    | 21                      |
| 町内の清掃活動など、地域の美化活動に参加している                                   | 12                  | 16                    | 8                       |
| 地域の花壇づくりや花植えなどの緑化活動に参加している                                 | 6                   | 12                    | 3                       |
| 植樹活動や水辺の清掃活動など、自然環境を保全する活動に参加している                          | 2                   | 3                     | 4                       |

VII. あなたが日頃考えることについておうかがいします。それぞれについてあなた自身がどう思うか、あなたの考えに最も近いと思う数字にひとつずつ○をつけてください。

|                                                                           |               | 全くそう<br>思わない | あまりそう<br>思わない | どちらとも<br>いえない | やや<br>そう思う | 非常に<br>そう思う | 合計 |
|---------------------------------------------------------------------------|---------------|--------------|---------------|---------------|------------|-------------|----|
| 私は将来の環境がどのようになるかを<br>考え、将来の環境がよくなるように<br>日々の行動を心がけている                     | 一般繰り返し回答者     | 1            | 3             | 13            | 22         | 9           | 48 |
|                                                                           | (%)           | (2.1)        | (6.3)         | (27.1)        | (45.8)     | (18.8)      |    |
|                                                                           | WS参加繰り返し回答者   | 0            | 1             | 10            | 26         | 10          | 47 |
|                                                                           | (%)           | (0.0)        | (2.1)         | (21.3)        | (55.3)     | (21.3)      |    |
| 私は意思決定をするときに、将来の環<br>境に与える影響を考える                                          | 3回目WS参加者（初回答） | 0            | 2             | 13            | 10         | 6           | 31 |
|                                                                           | (%)           | (0.0)        | (6.5)         | (41.9)        | (32.3)     | (19.4)      |    |
|                                                                           | 一般繰り返し回答者     | 2            | 7             | 22            | 13         | 4           | 48 |
|                                                                           | (%)           | (4.2)        | (14.6)        | (45.8)        | (27.1)     | (8.3)       |    |
| 私の行動の多くは、将来の環境に影響<br>している                                                 | WS参加繰り返し回答者   | 0            | 3             | 13            | 21         | 9           | 46 |
|                                                                           | (%)           | (0.0)        | (6.5)         | (28.3)        | (45.7)     | (19.6)      |    |
|                                                                           | 3回目WS参加者（初回答） | 1            | 2             | 14            | 11         | 3           | 31 |
|                                                                           | (%)           | (3.2)        | (6.5)         | (45.2)        | (35.5)     | (9.7)       |    |
| 私は将来の環境を守るためなら、現在<br>の興味関心を我慢してもよいと思う                                     | 一般繰り返し回答者     | 2            | 6             | 19            | 15         | 6           | 48 |
|                                                                           | (%)           | (4.2)        | (12.5)        | (39.6)        | (31.3)     | (12.5)      |    |
|                                                                           | WS参加繰り返し回答者   | 0            | 1             | 16            | 21         | 8           | 46 |
|                                                                           | (%)           | (0.0)        | (2.2)         | (34.8)        | (45.7)     | (17.4)      |    |
| 私は行動する時、その行動によって起<br>こる目先の結果だけを気にしている                                     | 3回目WS参加者（初回答） | 0            | 2             | 12            | 13         | 4           | 31 |
|                                                                           | (%)           | (0.0)        | (6.5)         | (38.7)        | (41.9)     | (12.9)      |    |
|                                                                           | 一般繰り返し回答者     | 2            | 7             | 20            | 18         | 0           | 47 |
|                                                                           | (%)           | (4.3)        | (14.9)        | (42.6)        | (38.3)     | (0.0)       |    |
| 将来起こる可能性のある環境問題は危<br>機的な状態になる前に解決されると思<br>うので、私は目の前の興味関心を満た<br>すことを優先している | WS参加繰り返し回答者   | 3            | 5             | 15            | 21         | 3           | 47 |
|                                                                           | (%)           | (6.4)        | (10.6)        | (31.9)        | (44.7)     | (6.4)       |    |
|                                                                           | 3回目WS参加者（初回答） | 2            | 5             | 10            | 12         | 2           | 31 |
|                                                                           | (%)           | (6.5)        | (16.1)        | (32.3)        | (38.7)     | (6.5)       |    |
| 将来の環境問題は後々対処できるのだ<br>から、私は現在の興味関心を我慢する<br>必要はないと思う                        | 一般繰り返し回答者     | 5            | 16            | 19            | 6          | 1           | 47 |
|                                                                           | (%)           | (10.6)       | (34.0)        | (40.4)        | (12.8)     | (2.1)       |    |
|                                                                           | WS参加繰り返し回答者   | 7            | 22            | 9             | 7          | 1           | 46 |
|                                                                           | (%)           | (15.2)       | (47.8)        | (19.6)        | (15.2)     | (2.2)       |    |
| 私は現在の興味関心を満たすためだけ<br>に行動し、将来起こる可能性のある環<br>境問題は後で対処すればよいと思う                | 3回目WS参加者（初回答） | 6            | 11            | 6             | 8          | 0           | 31 |
|                                                                           | (%)           | (19.4)       | (35.5)        | (19.4)        | (25.8)     | (0.0)       |    |
|                                                                           | 一般繰り返し回答者     | 9            | 21            | 14            | 2          | 1           | 47 |
|                                                                           | (%)           | (19.2)       | (44.7)        | (29.8)        | (4.3)      | (2.1)       |    |
| 私は現在の興味関心を満たすためだけ<br>に行動し、将来起こる可能性のある環<br>境問題は後で対処すればよいと思う                | WS参加繰り返し回答者   | 9            | 22            | 10            | 5          | 1           | 47 |
|                                                                           | (%)           | (19.2)       | (46.8)        | (21.3)        | (10.6)     | (2.1)       |    |
|                                                                           | 3回目WS参加者（初回答） | 9            | 12            | 8             | 2          | 0           | 31 |
|                                                                           | (%)           | (29.0)       | (38.7)        | (25.8)        | (6.5)      | (0.0)       |    |
| 私は現在の興味関心を満たすためだけ<br>に行動し、将来起こる可能性のある環<br>境問題は後で対処すればよいと思う                | 一般繰り返し回答者     | 9            | 25            | 10            | 2          | 1           | 47 |
|                                                                           | (%)           | (19.2)       | (53.2)        | (21.3)        | (4.3)      | (2.1)       |    |
|                                                                           | WS参加繰り返し回答者   | 16           | 18            | 9             | 2          | 1           | 46 |
|                                                                           | (%)           | (34.8)       | (39.1)        | (19.6)        | (4.4)      | (2.2)       |    |
| 私は現在の興味関心を満たすためだけ<br>に行動し、将来起こる可能性のある環<br>境問題は後で対処すればよいと思う                | 3回目WS参加者（初回答） | 13           | 15            | 2             | 1          | 0           | 31 |
|                                                                           | (%)           | (41.9)       | (48.4)        | (6.5)         | (3.2)      | (0.0)       |    |
| 私は現在の興味関心を満たすためだけ<br>に行動し、将来起こる可能性のある環<br>境問題は後で対処すればよいと思う                | 一般繰り返し回答者     | 20           | 19            | 7             | 1          | 1           | 48 |
|                                                                           | (%)           | (41.7)       | (39.6)        | (14.6)        | (2.1)      | (2.1)       |    |
|                                                                           | WS参加繰り返し回答者   | 23           | 17            | 5             | 1          | 0           | 46 |
|                                                                           | (%)           | (50.0)       | (37.0)        | (10.9)        | (2.2)      | (0.0)       |    |
| 私は現在の興味関心を満たすためだけ<br>に行動し、将来起こる可能性のある環<br>境問題は後で対処すればよいと思う                | 3回目WS参加者（初回答） | 20           | 10            | 0             | 1          | 0           | 31 |
|                                                                           | (%)           | (64.5)       | (32.3)        | (0.0)         | (3.2)      | (0.0)       |    |

VIII. 最後に、あなた自身についておかがいします。それぞれの質問に対して、特に指示のない場合は、当てはまる数字にひとつずつ○をつけてください。  
あなたのお住まいの区はどちらですか

|               | 中央区    | 北区     | 東区     | 白石区    | 厚別区   | 豊平区  | 清田区   | 南区    | 西区     | 手稲区    | 合計 |
|---------------|--------|--------|--------|--------|-------|------|-------|-------|--------|--------|----|
| 一般繰り返し回答者     | 7      | 8      | 8      | 6      | 0     | 4    | 1     | 2     | 6      | 6      | 48 |
| (%)           | (14.6) | (16.7) | (16.7) | (12.5) | (0.0) | 8.33 | (2.1) | (4.2) | (12.5) | (12.5) |    |
| WS参加繰り返し回答者   | 7      | 5      | 10     | 2      | 4     | 3    | 2     | 3     | 9      | 2      | 47 |
| (%)           | (14.9) | (10.6) | (21.3) | (4.3)  | (8.5) | 6.38 | (4.3) | (6.4) | (19.2) | (4.3)  |    |
| 3回目WS参加者（初回答） | 6      | 3      | 4      | 1      | 2     | 4    | 2     | 3     | 5      | 1      | 31 |
| (%)           | (19.4) | (9.7)  | (12.9) | (3.2)  | (6.5) | 12.9 | (6.5) | (9.7) | (16.1) | (3.2)  |    |

あなたの性別はどちらですか

|               | 男性     | 女性     | 合計 |
|---------------|--------|--------|----|
| 一般繰り返し回答者     | 24     | 24     | 48 |
| (%)           | (50.0) | (50.0) |    |
| WS参加繰り返し回答者   | 17     | 30     | 47 |
| (%)           | (36.2) | (63.8) |    |
| 3回目WS参加者（初回答） | 7      | 24     | 31 |
| (%)           | (22.6) | (77.4) |    |

あなたの年齢は何歳代ですか

|               | 20代   | 30代    | 40代    | 50代    | 60代    | 70代   | 80代以上 | 合計 |
|---------------|-------|--------|--------|--------|--------|-------|-------|----|
| 一般繰り返し回答者     | 2     | 6      | 13     | 10     | 10     | 7     | 0     | 48 |
| (%)           | (4.2) | (12.5) | (27.1) | (20.8) | (20.8) | 14.58 | (0.0) |    |
| WS参加繰り返し回答者   | 4     | 3      | 12     | 8      | 12     | 6     | 2     | 47 |
| (%)           | (8.5) | (6.4)  | (25.5) | (17.0) | (25.5) | 12.77 | (4.3) |    |
| 3回目WS参加者（初回答） | 3     | 4      | 6      | 6      | 5      | 7     | 0     | 31 |
| (%)           | (9.7) | (12.9) | (19.4) | (19.4) | (16.1) | 22.58 | (0.0) |    |

あなたご自身は何か仕事をお持ちですか

|               | 専業主婦・主夫 | パート・アルバイト・内職 | 非常規職員（2以外の） | 常時雇用されている一般従事者（会社員・公務員・団体職員など） | 自営業主やその家族従業者（農業含む） | 定年退職後・年金生活 | 学生    | その他   | 合計 |
|---------------|---------|--------------|-------------|--------------------------------|--------------------|------------|-------|-------|----|
| 一般繰り返し回答者     | 7       | 8            | 1           | 23                             | 2                  | 6          | 0     | 0     | 47 |
| (%)           | (14.9)  | (17.0)       | (2.1)       | (48.9)                         | (4.3)              | (12.8)     | (0.0) | (0.0) |    |
| WS参加繰り返し回答者   | 11      | 8            | 2           | 11                             | 5                  | 5          | 2     | 3     | 47 |
| (%)           | (23.4)  | (17.0)       | (4.3)       | (23.4)                         | (10.6)             | (10.6)     | (4.3) | (6.4) |    |
| 3回目WS参加者（初回答） | 7       | 8            | 2           | 8                              | 0                  | 3          | 1     | 2     | 31 |
| (%)           | (22.6)  | (25.8)       | (6.5)       | (25.8)                         | (0.0)              | (9.7)      | (3.2) | (6.5) |    |

同居している方はあなたを含めて何人ですか。一人暮らしの場合は「1」とご記入ください

|               | 1人     | 2人     | 3人     | 4人     | 5人以上  | 合計 |
|---------------|--------|--------|--------|--------|-------|----|
| 一般繰り返し回答者     | 5      | 15     | 8      | 18     | 2     | 48 |
| (%)           | (10.4) | (31.3) | (16.7) | (37.5) | (4.2) |    |
| WS参加繰り返し回答者   | 12     | 18     | 12     | 4      | 1     | 47 |
| (%)           | (25.5) | (38.3) | (25.5) | (8.5)  | (2.1) |    |
| 3回目WS参加者（初回答） | 7      | 11     | 9      | 1      | 3     | 31 |
| (%)           | (22.6) | (35.5) | (29.0) | (3.2)  | (9.7) |    |

あなたの現在のお住まいの形態は、次のどれに当てはまりますか

|               | 一戸建て（自己所有） | 集合住宅（自己所有） | 集合住宅（賃貸） | その他   | 合計 |
|---------------|------------|------------|----------|-------|----|
| 一般繰り返し回答者     | 21         | 13         | 10       | 4     | 48 |
| (%)           | (43.8)     | (27.1)     | (20.8)   | (8.3) |    |
| WS参加繰り返し回答者   | 18         | 12         | 16       | 1     | 47 |
| (%)           | (38.3)     | (25.5)     | (34.0)   | (2.1) |    |
| 3回目WS参加者（初回答） | 8          | 7          | 14       | 2     | 31 |
| (%)           | (25.8)     | (22.6)     | (45.2)   | (6.5) |    |

あなたの家から最寄りの交通機関の駅・停留所までは何分かかりますか

|               | 2,3分以内 | 5分     | 5~10分  | 10~15分 | 15分以上 | 合計 |
|---------------|--------|--------|--------|--------|-------|----|
| 一般繰り返し回答者     | 15     | 11     | 11     | 8      | 3     | 48 |
| (%)           | (31.3) | (22.9) | (22.9) | (16.7) | (6.3) |    |
| WS参加繰り返し回答者   | 13     | 11     | 17     | 6      | 0     | 47 |
| (%)           | (27.7) | (23.4) | (36.2) | (12.8) | (0.0) |    |
| 3回目WS参加者（初回答） | 7      | 8      | 10     | 5      | 1     | 31 |
| (%)           | (22.6) | (25.8) | (32.3) | (16.1) | (3.2) |    |

あなたは札幌市に住むようになって何年になりますか

|  | 10年未満 | 20年未満 | 30年未満 | 40年未満 | 50年未満 | 60年未満 | 60年以上 | 合計 |
|--|-------|-------|-------|-------|-------|-------|-------|----|
|--|-------|-------|-------|-------|-------|-------|-------|----|

|               |        |        |        |        |        |       |        |    |
|---------------|--------|--------|--------|--------|--------|-------|--------|----|
| 一般繰り返し回答者     | 6      | 6      | 9      | 8      | 10     | 4     | 5      | 48 |
| (%)           | (12.5) | (12.5) | (18.8) | (16.7) | (20.8) | (8.3) | (10.4) |    |
| WS参加繰り返し回答者   | 11     | 8      | 8      | 8      | 6      | 1     | 3      | 45 |
| (%)           | (24.4) | (17.8) | (17.8) | (17.8) | (13.3) | (2.2) | (6.7)  |    |
| 3回目WS参加者（初回答） | 9      | 2      | 6      | 7      | 1      | 1     | 4      | 30 |
| (%)           | (30.0) | (6.7)  | (20.0) | (23.3) | (3.3)  | (3.3) | (13.3) |    |
