# Supplementary material for: Procedural Fairness and Expected Outcome Evaluations in the Public Acceptance of Sustainability Policymaking: A Case Study of Multiple Stepwise Participatory Programs to Develop an Environmental Master Plan for Sapporo, Japan
Source: MDPI journal article supplement (doi:10.3390/su14063403), 2022-03-14
Supplement: s1 [file s1]

**Table S1.** Simple Tabulations with the original Japanese (1st Wave).

I. はじめに、札幌市が第二次環境基本計画の策定作業を行っていることについておうかがいします。

A. あなたは札幌市が第二次環境基本計画の策定作業を行っていることをご存じでしたか。当てはまる数字ひとつに○をつけてください。

|                                        |       | まったく聞<br>いたことが<br>ない | ほとんど聞<br>いたことが<br>ない | 少し聞いた<br>ことがある | 聞いたこと<br>がある | 聞いたこと<br>がありよく<br>知っている | 合計     |
|----------------------------------------|-------|----------------------|----------------------|----------------|--------------|-------------------------|--------|
| あなたは札幌市が第二次環境基本計画の策定作業を行っていることをご存じでしたか | 一般    | 290                  | 98                   | 34             | 26           | 1                       | 449    |
|                                        | %     | 64.6%                | 21.8%                | 7.6%           | 5.8%         | 0.2%                    | 100.0% |
|                                        | WS参加者 | 22                   | 19                   | 17             | 29           | 16                      | 103    |
|                                        | %     | 21.4%                | 18.4%                | 16.5%          | 28.2%        | 15.5%                   | 100.0% |

B. 上のA. で聞いたことがあるとお答えの方におうかがいします。どのように情報を入手しましたか。当てはまる数字すべてに○をつけてください。

|                           | 一般 | WS参加者 |
|---------------------------|----|-------|
| 市の広報誌を読んで                 | 37 | 26    |
| 新聞やテレビのニュースを見て            | 26 | 7     |
| インターネット(市の公式ページ)を見て       | 7  | 9     |
| インターネット(市の公式ページ以外の記事)を見て  | 1  | 0     |
| SNS(ツイッター、Facebookなど)を通じて | 0  | 2     |
| 家族から聞いて                   | 0  | 0     |
| 近所の方から聞いて                 | 3  | 0     |
| 職場の方や友人・知人から聞いて           | 4  | 4     |

Ⅱ. 別紙、「第2次札幌市環境基本計画骨子案の考え方の概要」をご覧になってから、以下の質問にお答えください。環境基本計画の骨子案で描かれている目指す札幌の姿について、あなたのご意見をおうかがいします。それぞれの質問に対して、あなたの考えに最も近いと思う数字にひとつずつ○をつけてください。

|                                     |       | 全くそう<br>思わない | あまりそう<br>思わない | どちらとも<br>いえない | ややそう<br>思う | 非常に<br>そう思う | 合計     |
|-------------------------------------|-------|--------------|---------------|---------------|------------|-------------|--------|
| この計画は望ましい札幌の未来像が描かれている              | 一般    | 4            | 26            | 103           | 205        | 117         | 455    |
|                                     | %     | 0.9%         | 5.7%          | 22.6%         | 45.1%      | 25.7%       | 100.0% |
|                                     | WS参加者 | 0            | 2             | 15            | 61         | 25          | 103    |
|                                     | %     | 0.0%         | 1.9%          | 14.6%         | 59.2%      | 24.3%       | 100.0% |
| この計画が実現したら社会全体にとってよいことである           | 一般    | 4            | 14            | 51            | 220        | 164         | 453    |
|                                     | %     | 0.9%         | 3.1%          | 11.3%         | 48.6%      | 36.2%       | 100.0% |
|                                     | WS参加者 | 0            | 0             | 7             | 38         | 58          | 103    |
|                                     | %     | 0.0%         | 0.0%          | 6.8%          | 36.9%      | 56.3%       | 100.0% |
| この計画は実現可能性がある                       | 一般    | 7            | 56            | 218           | 144        | 29          | 454    |
|                                     | %     | 1.5%         | 12.3%         | 48.0%         | 31.7%      | 6.4%        | 100.0% |
|                                     | WS参加者 | 0            | 10            | 35            | 51         | 7           | 103    |
|                                     | %     | 0.0%         | 9.7%          | 34.0%         | 49.5%      | 6.8%        | 100.0% |
| この計画は現実的である                         | 一般    | 5            | 78            | 211           | 131        | 28          | 453    |
|                                     | %     | 1.1%         | 17.2%         | 46.6%         | 28.9%      | 6.2%        | 100.0% |
|                                     | WS参加者 | 0            | 10            | 45            | 42         | 6           | 103    |
|                                     | %     | 0.0%         | 9.7%          | 43.7%         | 40.8%      | 5.8%        | 100.0% |
| この計画は理念だけで現実味がない                    | 一般    | 33           | 116           | 186           | 100        | 17          | 452    |
|                                     | %     | 7.3%         | 25.7%         | 41.2%         | 22.1%      | 3.8%        | 100.0% |
|                                     | WS参加者 | 7            | 34            | 36            | 21         | 3           | 101    |
|                                     | %     | 6.9%         | 33.7%         | 35.6%         | 20.8%      | 3.0%        | 100.0% |
| この計画は理想論に過ぎず、実際には実現されないだろう          | 一般    | 45           | 117           | 188           | 89         | 13          | 452    |
|                                     | %     | 10.0%        | 25.9%         | 41.6%         | 19.7%      | 2.9%        | 100.0% |
|                                     | WS参加者 | 13           | 36            | 35            | 15         | 2           | 101    |
|                                     | %     | 12.9%        | 35.6%         | 34.7%         | 14.9%      | 2.0%        | 100.0% |
| 計画に目標が示されることで、現在よりはよくなる方向に社会が向かうだろう | 一般    | 5            | 30            | 94            | 259        | 63          | 451    |
|                                     | %     | 1.1%         | 6.7%          | 20.8%         | 57.4%      | 14.0%       | 100.0% |
|                                     | WS参加者 | 0            | 0             | 15            | 59         | 29          | 103    |
|                                     | %     | 0.0%         | 0.0%          | 14.6%         | 57.3%      | 28.2%       | 100.0% |
| 計画に目標が示されることで、現在ある問題が今よりは改善されるだろう   | 一般    | 4            | 36            | 90            | 260        | 62          | 452    |
|                                     | %     | 0.9%         | 8.0%          | 19.9%         | 57.5%      | 13.7%       | 100.0% |
|                                     | WS参加者 | 0            | 3             | 9             | 59         | 32          | 103    |
|                                     | %     | 0.0%         | 2.9%          | 8.7%          | 57.3%      | 31.1%       | 100.0% |
| 多くの市民がこの計画を共有すれば、実現可能性が高まる          | 一般    | 7            | 23            | 83            | 238        | 103         | 454    |
|                                     | %     | 1.5%         | 5.1%          | 18.3%         | 52.4%      | 22.7%       | 100.0% |
|                                     | WS参加者 | 0            | 2             | 9             | 52         | 40          | 103    |
|                                     | %     | 0.0%         | 1.9%          | 8.7%          | 50.5%      | 38.8%       | 100.0% |
| 多くの市民がこの計画を共有すれば、目標が達成可能である         | 一般    | 6            | 38            | 133           | 201        | 76          | 454    |
|                                     | %     | 1.3%         | 8.4%          | 29.3%         | 44.3%      | 16.7%       | 100.0% |
|                                     | WS参加者 | 0            | 1             | 21            | 50         | 31          | 103    |
|                                     | %     | 0.0%         | 1.0%          | 20.4%         | 48.5%      | 30.1%       | 100.0% |
| この計画を知ったとしても、多くの市民は無関心だろう           | 一般    | 14           | 72            | 143           | 176        | 49          | 454    |
|                                     | %     | 3.1%         | 15.9%         | 31.5%         | 38.8%      | 10.8%       | 100.0% |
|                                     | WS参加者 | 3            | 21            | 46            | 25         | 8           | 103    |
|                                     | %     | 2.9%         | 20.4%         | 44.7%         | 24.3%      | 7.8%        | 100.0% |
| この計画を知ったとしても、多くの市民の行動は変わらないだろう      | 一般    | 13           | 77            | 147           | 173        | 42          | 452    |
|                                     | %     | 2.9%         | 17.0%         | 32.5%         | 38.3%      | 9.3%        | 100.0% |
|                                     | WS参加者 | 2            | 29            | 41            | 24         | 7           | 103    |
|                                     | %     | 1.9%         | 28.2%         | 39.8%         | 23.3%      | 6.8%        | 100.0% |
| 全体として、この計画は札幌市全体に<br>よい結果をもたらすだろう   | 一般    | 4            | 24            | 126           | 221        | 78          | 453    |
|                                     | %     | 0.9%         | 5.3%          | 27.8%         | 48.8%      | 17.2%       | 100.0% |
|                                     | WS参加者 | 0            | 2             | 10            | 61         | 30          | 103    |
|                                     | %     | 0.0%         | 1.9%          | 9.7%          | 59.2%      | 29.1%       | 100.0% |
| 全体として、この計画はよいものだと評価できる              | 一般    | 3            | 24            | 104           | 228        | 96          | 455    |
|                                     | %     | 0.7%         | 5.3%          | 22.9%         | 50.1%      | 21.1%       | 100.0% |
|                                     | WS参加者 | 0            | 2             | 12            | 65         | 24          | 103    |
|                                     | %     | 0.0%         | 1.9%          | 11.7%         | 63.1%      | 23.3%       | 100.0% |

Ⅲ. 環境基本計画策定に際して行われた、市民参加ワークショップについておうかがいします。

A. あなたは札幌市が環境基本計画の見直し作業に際して、市民ワークショップなどを行っていることをご存じでしたか。当てはまる数字ひとつに○をつけてください。

|                                                       |       | まったく聞<br>いたことが<br>ない | ほとんど聞<br>いたことが<br>ない | 少し聞いたこ<br>とがある | 聞いたことが<br>ある | 聞いたことが<br>ありよく知っ<br>ている | 合計     |
|-------------------------------------------------------|-------|----------------------|----------------------|----------------|--------------|-------------------------|--------|
| あなたは札幌市が環境基本計画の見直し作業に際して、市民ワークショップなどを行っていることをご存じでしたか。 | 一般    | 275                  | 110                  | 38             | 11           | 1                       | 435    |
|                                                       | %     | 63.2%                | 25.3%                | 8.7%           | 2.5%         | 0.2%                    | 100.0% |
|                                                       | WS参加者 | 27                   | 19                   | 9              | 20           | 27                      | 102    |
|                                                       | %     | 26.5%                | 18.6%                | 8.8%           | 19.6%        | 26.5%                   | 100.0% |

B. 別紙、「第2次環境基本計画策定に向けた市民意見反映のプロセス」をご覧になってから以下の質問にお答えください。環境基本計画策定に際して、市民の声を聴き、反映させていくプロセスについて、あなたのご意見をおうかがいします。それぞれの質問に対して、あなたの考えに最も近いと思う数字にひとつずつ○をつけてください。

|                                                            |       | 全くそ<br>う思わ<br>ない | あまりそ<br>う思<br>わな<br>い | どちら<br>とも<br>い<br>え<br>ない | ややそ<br>う思<br>う | 非常<br>に<br>そ<br>う<br>思<br>う | 合計     |
|------------------------------------------------------------|-------|------------------|-----------------------|---------------------------|----------------|-----------------------------|--------|
| 市は市民に十分な情報発信・情報開示をしている                                     | 一般    | 60               | 197                   | 137                       | 54             | 7                           | 455    |
|                                                            | %     | 13.2%            | 43.3%                 | 30.1%                     | 11.9%          | 1.5%                        | 100.0% |
|                                                            | WS参加者 | 9                | 33                    | 34                        | 23             | 3                           | 102    |
|                                                            | %     | 8.8%             | 32.4%                 | 33.3%                     | 22.5%          | 2.9%                        | 100.0% |
| 市は市民にわかりやすい説明をしている                                         | 一般    | 56               | 202                   | 147                       | 45             | 5                           | 455    |
|                                                            | %     | 12.3%            | 44.4%                 | 32.3%                     | 9.9%           | 1.1%                        | 100.0% |
|                                                            | WS参加者 | 9                | 39                    | 35                        | 18             | 1                           | 102    |
|                                                            | %     | 8.8%             | 38.2%                 | 34.3%                     | 17.6%          | 1.0%                        | 100.0% |
| 計画策定にあたり市民が参加できる機会が開かれている                                  | 一般    | 29               | 155                   | 172                       | 85             | 12                          | 453    |
|                                                            | %     | 6.4%             | 34.2%                 | 38.0%                     | 18.8%          | 2.6%                        | 100.0% |
|                                                            | WS参加者 | 3                | 30                    | 26                        | 39             | 5                           | 103    |
|                                                            | %     | 2.9%             | 29.1%                 | 25.2%                     | 37.9%          | 4.9%                        | 100.0% |
| 計画策定にあたり市民は意見を述べる機会が十分にある                                  | 一般    | 38               | 166                   | 177                       | 64             | 9                           | 454    |
|                                                            | %     | 8.4%             | 36.6%                 | 39.0%                     | 14.1%          | 2.0%                        | 100.0% |
|                                                            | WS参加者 | 7                | 41                    | 35                        | 17             | 2                           | 102    |
|                                                            | %     | 6.9%             | 40.2%                 | 34.3%                     | 16.7%          | 2.0%                        | 100.0% |
| 市民ワークショップ参加者の中には、自分と似た考えをもつ人もいたろう                          | 一般    | 6                | 34                    | 241                       | 146            | 25                          | 452    |
|                                                            | %     | 1.3%             | 7.5%                  | 53.3%                     | 32.3%          | 5.5%                        | 100.0% |
|                                                            | WS参加者 | 0                | 3                     | 18                        | 58             | 24                          | 103    |
|                                                            | %     | 0.0%             | 2.9%                  | 17.5%                     | 56.3%          | 23.3%                       | 100.0% |
| 市民ワークショップの参加者は、自分と似た立場の人もいたろう                              | 一般    | 10               | 30                    | 244                       | 146            | 23                          | 453    |
|                                                            | %     | 2.2%             | 6.6%                  | 53.9%                     | 32.2%          | 5.1%                        | 100.0% |
|                                                            | WS参加者 | 0                | 4                     | 24                        | 56             | 19                          | 103    |
|                                                            | %     | 0.0%             | 3.9%                  | 23.3%                     | 54.4%          | 18.4%                       | 100.0% |
| 市民ワークショップを行う前に、環境活動実践者や海外出身者の意見を求めたことで、議論をしやすくなっただろう       | 一般    | 11               | 44                    | 186                       | 173            | 37                          | 451    |
|                                                            | %     | 2.4%             | 9.8%                  | 41.2%                     | 38.4%          | 8.2%                        | 100.0% |
|                                                            | WS参加者 | 2                | 6                     | 35                        | 50             | 9                           | 102    |
|                                                            | %     | 2.0%             | 5.9%                  | 34.3%                     | 49.0%          | 8.8%                        | 100.0% |
| 市民ワークショップを行う前に、環境活動実践者や海外出身者の意見を求めたことで、重要な視点を取り込むことができただろう | 一般    | 11               | 43                    | 190                       | 173            | 34                          | 451    |
|                                                            | %     | 2.4%             | 9.5%                  | 42.1%                     | 38.4%          | 7.5%                        | 100.0% |
|                                                            | WS参加者 | 1                | 4                     | 35                        | 50             | 12                          | 102    |
|                                                            | %     | 1.0%             | 3.9%                  | 34.3%                     | 49.0%          | 11.8%                       | 100.0% |
| ワークショップに来るような人は関心の高い人だけで、市民全体の意見とはいえない                     | 一般    | 9                | 23                    | 121                       | 214            | 87                          | 454    |
|                                                            | %     | 2.0%             | 5.1%                  | 26.7%                     | 47.1%          | 19.2%                       | 100.0% |
|                                                            | WS参加者 | 1                | 19                    | 26                        | 43             | 14                          | 103    |
|                                                            | %     | 1.0%             | 18.4%                 | 25.2%                     | 41.7%          | 13.6%                       | 100.0% |
| 市民ワークショップの参加者は80名しかおらず、市民全体の意見とはいえない                       | 一般    | 9                | 44                    | 112                       | 190            | 99                          | 454    |
|                                                            | %     | 2.0%             | 9.7%                  | 24.7%                     | 41.9%          | 21.8%                       | 100.0% |
|                                                            | WS参加者 | 7                | 21                    | 29                        | 35             | 11                          | 103    |
|                                                            | %     | 6.8%             | 20.4%                 | 28.2%                     | 34.0%          | 10.7%                       | 100.0% |
| 市民ワークショップで出された意見は、多様な価値が含まれていただろう                          | 一般    | 10               | 57                    | 203                       | 161            | 20                          | 451    |
|                                                            | %     | 2.2%             | 12.6%                 | 45.0%                     | 35.7%          | 4.4%                        | 100.0% |
|                                                            | WS参加者 | 1                | 7                     | 15                        | 53             | 27                          | 103    |
|                                                            | %     | 1.0%             | 6.8%                  | 14.6%                     | 51.5%          | 26.2%                       | 100.0% |

|                                       |       |      |       |       |       |       |        |
|---------------------------------------|-------|------|-------|-------|-------|-------|--------|
|                                       | 一般    | 14   | 71    | 255   | 99    | 13    | 452    |
| 市民ワークショップでは、少数の意見も尊重されただろう            | %     | 3.1% | 15.7% | 56.4% | 21.9% | 2.9%  | 100.0% |
|                                       | WS参加者 | 2    | 15    | 26    | 47    | 13    | 103    |
|                                       | %     | 1.9% | 14.6% | 25.2% | 45.6% | 12.6% | 100.0% |
|                                       | 一般    | 13   | 47    | 271   | 107   | 15    | 453    |
| 市民ワークショップで出された意見が基本計画に反映されているだろう      | %     | 2.9% | 10.4% | 59.8% | 23.6% | 3.3%  | 100.0% |
|                                       | WS参加者 | 1    | 11    | 47    | 42    | 2     | 103    |
|                                       | %     | 1.0% | 10.7% | 45.6% | 40.8% | 1.9%  | 100.0% |
|                                       | 一般    | 9    | 31    | 269   | 131   | 12    | 452    |
| この計画には、市民ワークショップで出された意見が踏まえられているだろう   | %     | 2.0% | 6.9%  | 59.5% | 29.0% | 2.7%  | 100.0% |
|                                       | WS参加者 | 3    | 8     | 38    | 51    | 3     | 103    |
|                                       | %     | 2.9% | 7.8%  | 36.9% | 49.5% | 2.9%  | 100.0% |
|                                       | 一般    | 9    | 48    | 220   | 151   | 25    | 453    |
| 今後実施予定のパブリックコメントは、市民の声を届けることに繋がるだろう   | %     | 2.0% | 10.6% | 48.6% | 33.3% | 5.5%  | 100.0% |
|                                       | WS参加者 | 0    | 3     | 31    | 58    | 10    | 102    |
|                                       | %     | 0.0% | 2.9%  | 30.4% | 56.9% | 9.8%  | 100.0% |
|                                       | 一般    | 11   | 40    | 274   | 111   | 16    | 452    |
| 今後実施予定のパブリックコメントは、ワークショップよりも発言しやすいだろう | %     | 2.4% | 8.8%  | 60.6% | 24.6% | 3.5%  | 100.0% |
|                                       | WS参加者 | 2    | 5     | 59    | 31    | 5     | 102    |
|                                       | %     | 2.0% | 4.9%  | 57.8% | 30.4% | 4.9%  | 100.0% |
|                                       | 一般    | 11   | 35    | 277   | 117   | 13    | 453    |
| 全体として、計画策定に際し、公正な過程を経ている              | %     | 2.4% | 7.7%  | 61.1% | 25.8% | 2.9%  | 100.0% |
|                                       | WS参加者 | 0    | 5     | 27    | 59    | 12    | 103    |
|                                       | %     | 0.0% | 4.9%  | 26.2% | 57.3% | 11.7% | 100.0% |
|                                       | 一般    | 9    | 48    | 264   | 120   | 12    | 453    |
| 全体として、市民が参加できるやり方や計画策定の進め方は公正だった      | %     | 2.0% | 10.6% | 58.3% | 26.5% | 2.6%  | 100.0% |
|                                       | WS参加者 | 1    | 4     | 24    | 57    | 17    | 103    |
|                                       | %     | 1.0% | 3.9%  | 23.3% | 55.3% | 16.5% | 100.0% |

C. ワークショップへ参加された方へおうかがいします。ワークショップへ参加されたときに、どのように感じましたか。それぞれの質問に対して、あなたの考えに最も近いと思う数字にひとつずつ○をつけてください。

|                                              | 全くそう<br>思わない | あまりそう思<br>わない | どちらともい<br>えない | ややそう思う | 非常に<br>そう思う | 合計     |
|----------------------------------------------|--------------|---------------|---------------|--------|-------------|--------|
| ワークショップ参加者の間で、札幌の未来像が形成され、共有された              | WS参加者 1      | 4             | 23            | 62     | 13          | 103    |
|                                              | % 1.0%       | 3.9%          | 22.3%         | 60.2%  | 12.6%       | 100.0% |
| ワークショップ参加者は、札幌市が目指す目標を共有できた                  | WS参加者 1      | 9             | 23            | 50     | 19          | 102    |
|                                              | % 1.0%       | 8.8%          | 22.5%         | 49.0%  | 18.6%       | 100.0% |
| ワークショップでは十分な議論がなされ、よい未来像を描くことができた            | WS参加者 2      | 10            | 24            | 57     | 10          | 103    |
|                                              | % 1.9%       | 9.7%          | 23.3%         | 55.3%  | 9.7%        | 100.0% |
| 2050年の札幌といわれても、あまりにも遠い将来のことでイメージがわかず議論しにくかった | WS参加者 4      | 31            | 23            | 35     | 10          | 103    |
|                                              | % 3.9%       | 30.1%         | 22.3%         | 34.0%  | 9.7%        | 100.0% |
| 札幌市の未来像と言われても、何を想像していいのか困った                  | WS参加者 6      | 38            | 15            | 37     | 6           | 102    |
|                                              | % 5.9%       | 37.3%         | 14.7%         | 36.3%  | 5.9%        | 100.0% |
| はじめに未来像をイメージし、そこから逆算して取り組みを考えることは、重要な考え方だと思う | WS参加者 0      | 3             | 7             | 50     | 43          | 103    |
|                                              | % 0.0%       | 2.9%          | 6.8%          | 48.5%  | 41.7%       | 100.0% |
| ワークショップに参加したことで、私にとって得るものがあった                | WS参加者 0      | 0             | 6             | 41     | 56          | 103    |
|                                              | % 0.0%       | 0.0%          | 5.8%          | 39.8%  | 54.4%       | 100.0% |
| ワークショップに参加したことで、私も計画づくりに影響を及ぼせた              | WS参加者 1      | 11            | 35            | 40     | 15          | 102    |
|                                              | % 1.0%       | 10.8%         | 34.3%         | 39.2%  | 14.7%       | 100.0% |

Ⅳ. 環境基本計画骨子の内容と、計画を作るまでの進め方をあわせた全体的なことについておうかがいします。それぞれの質問に対して、あなたの考えに最も近いと思う数字にひとつずつ○をつけてください。

|                                                |       | 全くそう<br>思わない | あまりそう<br>思わない | どちらとも<br>いえない | ややそう<br>思う | 非常に<br>そう思う | 合計     |
|------------------------------------------------|-------|--------------|---------------|---------------|------------|-------------|--------|
| 計画の骨子とワークショップでの議論は、すべての市民に共通に目指すべき未来像を提供している   | 一般    | 13           | 73            | 185           | 150        | 26          | 447    |
|                                                | %     | 2.9%         | 16.3%         | 41.4%         | 33.6%      | 5.8%        | 100.0% |
|                                                | WS参加者 | 1            | 11            | 36            | 41         | 14          | 103    |
|                                                | %     | 1.0%         | 10.7%         | 35.0%         | 39.8%      | 13.6%       | 100.0% |
| 計画の骨子とワークショップでの議論は、多様な価値とすべての市民に共通の目標がふまえられている | 一般    | 12           | 75            | 209           | 134        | 19          | 449    |
|                                                | %     | 2.7%         | 16.7%         | 46.5%         | 29.8%      | 4.2%        | 100.0% |
|                                                | WS参加者 | 0            | 14            | 38            | 43         | 8           | 103    |
|                                                | %     | 0.0%         | 13.6%         | 36.9%         | 41.7%      | 7.8%        | 100.0% |
| 私は、計画に描かれている札幌の未来像を支持できる                       | 一般    | 6            | 14            | 120           | 228        | 81          | 449    |
|                                                | %     | 1.3%         | 3.1%          | 26.7%         | 50.8%      | 18.0%       | 100.0% |
|                                                | WS参加者 | 0            | 2             | 13            | 55         | 31          | 101    |
|                                                | %     | 0.0%         | 2.0%          | 12.9%         | 54.5%      | 30.7%       | 100.0% |
| 私は、計画に描かれている札幌の未来像を目指すべきだと思う                   | 一般    | 2            | 13            | 110           | 232        | 94          | 451    |
|                                                | %     | 0.4%         | 2.9%          | 24.4%         | 51.4%      | 20.8%       | 100.0% |
|                                                | WS参加者 | 0            | 2             | 11            | 51         | 39          | 103    |
|                                                | %     | 0.0%         | 1.9%          | 10.7%         | 49.5%      | 37.9%       | 100.0% |
| 多くの市民は、計画に描かれている札幌の未来像を支持できるだろう                | 一般    | 2            | 37            | 197           | 182        | 31          | 449    |
|                                                | %     | 0.4%         | 8.2%          | 43.9%         | 40.5%      | 6.9%        | 100.0% |
|                                                | WS参加者 | 0            | 6             | 40            | 45         | 12          | 103    |
|                                                | %     | 0.0%         | 5.8%          | 38.8%         | 43.7%      | 11.7%       | 100.0% |
| 多くの市民は、計画に描かれている札幌の未来像を目指すべきだと思うだろう            | 一般    | 5            | 43            | 186           | 177        | 39          | 450    |
|                                                | %     | 1.1%         | 9.6%          | 41.3%         | 39.3%      | 8.7%        | 100.0% |
|                                                | WS参加者 | 0            | 8             | 34            | 51         | 10          | 103    |
|                                                | %     | 0.0%         | 7.8%          | 33.0%         | 49.5%      | 9.7%        | 100.0% |
| 私は、計画をつくるまでの進め方も含め、計画の骨子案に納得できる                | 一般    | 7            | 39            | 208           | 163        | 33          | 450    |
|                                                | %     | 1.6%         | 8.7%          | 46.2%         | 36.2%      | 7.3%        | 100.0% |
|                                                | WS参加者 | 1            | 5             | 24            | 56         | 17          | 103    |
|                                                | %     | 1.0%         | 4.9%          | 23.3%         | 54.4%      | 16.5%       | 100.0% |
| 私は、計画をつくるまでの進め方も含め、計画の骨子案を受け入れられる              | 一般    | 9            | 32            | 183           | 195        | 32          | 451    |
|                                                | %     | 2.0%         | 7.1%          | 40.6%         | 43.2%      | 7.1%        | 100.0% |
|                                                | WS参加者 | 1            | 3             | 19            | 59         | 19          | 101    |
|                                                | %     | 1.0%         | 3.0%          | 18.8%         | 58.4%      | 18.8%       | 100.0% |
| 計画に描かれている札幌の未来像は、このままでは多くの市民が共有できないだろう         | 一般    | 14           | 88            | 200           | 116        | 31          | 449    |
|                                                | %     | 3.1%         | 19.6%         | 44.5%         | 25.8%      | 6.9%        | 100.0% |
|                                                | WS参加者 | 4            | 34            | 31            | 20         | 12          | 101    |
|                                                | %     | 4.0%         | 33.7%         | 30.7%         | 19.8%      | 11.9%       | 100.0% |
| 市民が計画に描かれている札幌の未来像を共有できるよう、市はもっと情報発信すべきである     | 一般    | 3            | 6             | 69            | 198        | 174         | 450    |
|                                                | %     | 0.7%         | 1.3%          | 15.3%         | 44.0%      | 38.7%       | 100.0% |
|                                                | WS参加者 | 0            | 1             | 8             | 37         | 56          | 102    |
|                                                | %     | 0.0%         | 1.0%          | 7.8%          | 36.3%      | 54.9%       | 100.0% |
| 計画案策定後も、市民が参加できる場を広げるべきである                     | 一般    | 1            | 8             | 86            | 227        | 129         | 451    |
|                                                | %     | 0.2%         | 1.8%          | 19.1%         | 50.3%      | 28.6%       | 100.0% |
|                                                | WS参加者 | 0            | 0             | 3             | 51         | 48          | 102    |
|                                                | %     | 0.0%         | 0.0%          | 2.9%          | 50.0%      | 47.1%       | 100.0% |
| 機会があったら私もワークショップに参加したい                         | 一般    | 53           | 100           | 195           | 79         | 24          | 451    |
|                                                | %     | 11.8%        | 22.2%         | 43.2%         | 17.5%      | 5.3%        | 100.0% |
|                                                | WS参加者 | 0            | 0             | 7             | 43         | 51          | 101    |
|                                                | %     | 0.0%         | 0.0%          | 6.9%          | 42.6%      | 50.5%       | 100.0% |

V. あなた自身の日常のお付き合いや地域での活動などについてお尋ねします。

A. あなたは次のような地域・コミュニティでの活動やイベントに参加したことがありますか。当てはまる数字にすべて○をつけてください。

|                                     | 一般  | WS参加者 |
|-------------------------------------|-----|-------|
| お祭り(公園や神社などで開かれる小規模なもの)             | 260 | 75    |
| 防犯・防災活動                             | 83  | 23    |
| 花植えや花壇づくりなど                         | 80  | 23    |
| 集団資源回収活動やごみ拾いなど                     | 171 | 52    |
| 町内会、老人会、婦人会、子ども会などが開くバザーなどのイベントや交流会 | 145 | 39    |
| 町内会などの組織を運用するための定期的な会合              | 110 | 36    |
| その他                                 | 8   | 10    |
| 何も参加したことがない                         | 120 | 12    |

B. 地域・コミュニティにかかわらず、あなたは次のような活動に参加することがありますか。当てはまる数字にすべて○をつけてください。

|                                                          | 一般  | WS参加者 |
|----------------------------------------------------------|-----|-------|
| 子育てに関する交流(親同士のお茶飲みや育児相談など)                               | 59  | 21    |
| PTAや放課後の課外活動などの学校関連の活動                                   | 57  | 23    |
| 福祉や介護に関する相談や集まり(デイケアやピアサポートなど)                           | 50  | 22    |
| 環境問題について考える活動や勉強会(生ごみの堆肥化やリユース・リサイクルといった取り組みに関する講習会や集まり) | 48  | 27    |
| 趣味の活動(音楽や絵画、囲碁・将棋、華道・茶道、スポーツなど)                          | 149 | 56    |
| ペットを飼っている人同士の集まり                                         | 21  | 4     |
| その他                                                      | 23  | 8     |
| 何も参加していない                                                | 198 | 19    |

VI. 現在のあなたが取り組んでいるふだんの環境保全行動についておうかがいします。あなたは次のような行動をふだんからしていますか。あてはまる数字にすべて○をつけてください。

|                                                            | 一般  | WS参加者 |
|------------------------------------------------------------|-----|-------|
| 使用済み油や調理くずなどを下水に流さずに処理している                                 | 345 | 85    |
| 家の庭やベランダなどで植物を育てている                                        | 209 | 63    |
| 食材や日用品は無駄なく使い切る                                            | 291 | 68    |
| 割り箸を使わないようにしている                                            | 180 | 36    |
| レジ袋を辞退している                                                 | 313 | 76    |
| 普段使用する日用品や服などは、なるべく手入れや修理をしながら大切に使用している                    | 232 | 69    |
| 日用品や服などは、再利用したり、リサイクルショップへ売ったりしている                         | 184 | 56    |
| ごみの分別区分やごみを出す曜日を守っている                                      | 429 | 101   |
| 使用していない部屋の照明や家電製品などは切るようにしている                              | 383 | 94    |
| 不要な待機電力を減らすため、使っていない家電製品のコンセントを抜くようにしている                   | 198 | 56    |
| 夏場の冷房温度は28℃程度(26～30℃)、冬場の暖房温度は20℃程度(18～22℃)を目安に設定している      | 202 | 55    |
| 北海道産の食材を積極的に選ぶようにしている                                      | 271 | 71    |
| 季節に応じた旬の食材を選ぶようにしている                                       | 250 | 69    |
| 日用品を購入する際は、エコマークなどの環境ラベルがついているものを選ぶようにしている                 | 64  | 22    |
| 家電や自動車を購入する際は、環境に配慮した機能があるものを選ぶようにしている                     | 174 | 48    |
| 環境問題に熱心に取り組んでいる生産者や販売店の商品を選ぶようにしている                        | 85  | 23    |
| 徒歩や自転車で行ける範囲の移動は、自動車の利用を控えている                              | 232 | 67    |
| 電車やバスなどの公共交通を積極的に利用している                                    | 234 | 64    |
| 自動車を運転する際は、アクセルをゆっくり踏んだり、アイドリングストップを行ったりするなど、エコドライブを実践している | 182 | 49    |
| 古紙などの集団資源回収活動に参加している                                       | 306 | 72    |
| 町内の清掃活動など、地域の美化活動に参加している                                   | 128 | 39    |
| 地域の花壇づくりや花植えなどの緑化活動に参加している                                 | 52  | 23    |
| 植樹活動や水辺の清掃活動など、自然環境を保全する活動に参加している                          | 21  | 14    |

Ⅶ. あなたが日頃考えることについておうかがいします。それぞれについてあなた自身はどう思うか、あてはまるものひとつずつに○をつけてください。

|                                                                           |       | 全くそう<br>思わない | あまりそう思<br>わない | どちらともい<br>えない | ややそう思う | 非常に<br>そう思う | 合計     |
|---------------------------------------------------------------------------|-------|--------------|---------------|---------------|--------|-------------|--------|
| 私は将来の環境がどのようになるかを<br>考え、将来の環境がよくなるように日々<br>の行動を心がけている                     | 一般    | 8            | 54            | 159           | 181    | 44          | 446    |
|                                                                           | %     | 1.8%         | 12.1%         | 35.7%         | 40.6%  | 9.9%        | 100.0% |
|                                                                           | WS参加者 | 0            | 12            | 22            | 43     | 25          | 102    |
|                                                                           | %     | 0.0%         | 11.8%         | 21.6%         | 42.2%  | 24.5%       | 100.0% |
| 私は意思決定をするときに、将来の環<br>境に与える影響を考える                                          | 一般    | 16           | 65            | 181           | 148    | 38          | 448    |
|                                                                           | %     | 3.6%         | 14.5%         | 40.4%         | 33.0%  | 8.5%        | 100.0% |
|                                                                           | WS参加者 | 2            | 15            | 24            | 46     | 14          | 101    |
|                                                                           | %     | 2.0%         | 14.9%         | 23.8%         | 45.5%  | 13.9%       | 100.0% |
| 私の行動の多くは、将来の環境に影響<br>している                                                 | 一般    | 16           | 79            | 188           | 138    | 24          | 445    |
|                                                                           | %     | 3.6%         | 17.8%         | 42.2%         | 31.0%  | 5.4%        | 100.0% |
|                                                                           | WS参加者 | 1            | 16            | 39            | 27     | 18          | 101    |
|                                                                           | %     | 1.0%         | 15.8%         | 38.6%         | 26.7%  | 17.8%       | 100.0% |
| 私は将来の環境を守るためなら、現在<br>の興味関心を我慢してもよいと思う                                     | 一般    | 21           | 95            | 199           | 115    | 16          | 446    |
|                                                                           | %     | 4.7%         | 21.3%         | 44.6%         | 25.8%  | 3.6%        | 100.0% |
|                                                                           | WS参加者 | 3            | 20            | 31            | 40     | 8           | 102    |
|                                                                           | %     | 2.9%         | 19.6%         | 30.4%         | 39.2%  | 7.8%        | 100.0% |
| 私は行動する時、その行動によって起<br>こる目先の結果だけを気にしている                                     | 一般    | 38           | 149           | 187           | 62     | 10          | 446    |
|                                                                           | %     | 8.5%         | 33.4%         | 41.9%         | 13.9%  | 2.2%        | 100.0% |
|                                                                           | WS参加者 | 15           | 41            | 38            | 7      | 1           | 102    |
|                                                                           | %     | 14.7%        | 40.2%         | 37.3%         | 6.9%   | 1.0%        | 100.0% |
| 将来起こる可能性のある環境問題は危<br>機的な状態になる前に解決されると思<br>うので、私は目の前の興味関心を満た<br>すことを優先している | 一般    | 72           | 178           | 149           | 41     | 7           | 447    |
|                                                                           | %     | 16.1%        | 39.8%         | 33.3%         | 9.2%   | 1.6%        | 100.0% |
|                                                                           | WS参加者 | 26           | 46            | 21            | 8      | 1           | 102    |
|                                                                           | %     | 25.5%        | 45.1%         | 20.6%         | 7.8%   | 1.0%        | 100.0% |
| 将来の環境問題は後々対処できるのだ<br>から、私は現在の興味関心を我慢する<br>必要はないと思う                        | 一般    | 105          | 195           | 115           | 28     | 5           | 448    |
|                                                                           | %     | 23.4%        | 43.5%         | 25.7%         | 6.3%   | 1.1%        | 100.0% |
|                                                                           | WS参加者 | 41           | 39            | 16            | 6      | 0           | 102    |
|                                                                           | %     | 40.2%        | 38.2%         | 15.7%         | 5.9%   | 0.0%        | 100.0% |
| 私は現在の興味関心を満たすためだけ<br>に行動し、将来起こる可能性のある環<br>境問題は後で対処すればよいと思う                | 一般    | 186          | 164           | 78            | 16     | 4           | 448    |
|                                                                           | %     | 41.5%        | 36.6%         | 17.4%         | 3.6%   | 0.9%        | 100.0% |
|                                                                           | WS参加者 | 58           | 35            | 4             | 5      | 0           | 102    |
|                                                                           | %     | 56.9%        | 34.3%         | 3.9%          | 4.9%   | 0.0%        | 100.0% |



Ⅷ. 最後に、あなた自身についておうかがいします。それぞれの質問に対して、特に指示のない場合は、当てはまる数字にひとつずつ○をつけてください。

あなたのお住まいの区はどちらですか

|       | 中央区   | 北区    | 東区    | 白石区   | 厚別区  | 豊平区   | 清田区  | 南区   | 西区    | 手稲区  | 合計     |
|-------|-------|-------|-------|-------|------|-------|------|------|-------|------|--------|
| 一般    | 51    | 66    | 51    | 49    | 32   | 53    | 31   | 37   | 56    | 30   | 456    |
| %     | 11.2% | 14.5% | 11.2% | 10.7% | 7.0% | 11.6% | 6.8% | 8.1% | 12.3% | 6.6% | 100.0% |
| WS参加者 | 13    | 12    | 19    | 6     | 7    | 7     | 7    | 9    | 14    | 9    | 103    |
| %     | 12.6% | 11.7% | 18.4% | 5.8%  | 6.8% | 6.8%  | 6.8% | 8.7% | 13.6% | 8.7% | 100.0% |

あなたの性別はどちらですか

|       | 男性    | 女性    | 合計     |
|-------|-------|-------|--------|
| 一般    | 192   | 262   | 454    |
| %     | 42.3% | 57.7% | 100.0% |
| WS参加者 | 44    | 59    | 103    |
| %     | 42.7% | 57.3% | 100.0% |

あなたの年齢は何歳代ですか

|       | 10代  | 20代  | 30代   | 40代   | 50代   | 60代   | 70代以上 | 合計     |
|-------|------|------|-------|-------|-------|-------|-------|--------|
| 一般    | 5    | 37   | 57    | 90    | 80    | 102   | 85    | 456    |
| %     | 1.1% | 8.1% | 12.5% | 19.7% | 17.5% | 22.4% | 18.6% | 100.0% |
| WS参加者 | 0    | 10   | 11    | 23    | 17    | 29    | 13    | 103    |
| %     | 0.0% | 9.7% | 10.7% | 22.3% | 16.5% | 28.2% | 12.6% | 100.0% |

あなたご自身は何か仕事をお持ちですか

|       | 専業主婦・<br>主夫 | パート・ア<br>ルバイト・<br>内職 | 非正規職<br>員(2以外<br>の) | 常時雇用<br>されている<br>一般従事<br>者(会社<br>員・公務<br>員・団体職<br>員など) | 自営業主<br>やその家<br>族従業者<br>(農業も含<br>む) | 定年退職<br>後・年金生<br>活 | 学生   | その他  | 合計     |
|-------|-------------|----------------------|---------------------|--------------------------------------------------------|-------------------------------------|--------------------|------|------|--------|
| 一般    | 90          | 79                   | 23                  | 149                                                    | 32                                  | 53                 | 13   | 14   | 453    |
| %     | 19.9%       | 17.4%                | 5.1%                | 32.9%                                                  | 7.1%                                | 11.7%              | 2.9% | 3.1% | 100.0% |
| WS参加者 | 16          | 11                   | 3                   | 40                                                     | 8                                   | 17                 | 4    | 3    | 102    |
| %     | 15.7%       | 10.8%                | 2.9%                | 39.2%                                                  | 7.8%                                | 16.7%              | 3.9% | 2.9% | 100.0% |

同居している方はあなたを含めて何人ですか

|       | 1人    | 2人    | 3人    | 4人    | 5人以上 | 合計     |
|-------|-------|-------|-------|-------|------|--------|
| 一般    | 84    | 161   | 108   | 77    | 26   | 456    |
| %     | 18.4% | 35.3% | 23.7% | 16.9% | 5.7% | 100.0% |
| WS参加者 | 22    | 35    | 22    | 21    | 3    | 103    |
| %     | 21.4% | 34.0% | 21.4% | 20.4% | 2.9% | 100.0% |

同居している方の中に、20歳以下の方はいらっしゃいますか

|       | はい    | いいえ   | 合計     |
|-------|-------|-------|--------|
| 一般    | 113   | 340   | 453    |
| %     | 24.9% | 75.1% | 100.0% |
| WS参加者 | 30    | 73    | 103    |
| %     | 29.1% | 70.9% | 100.0% |

はいとお答えの方にお尋ねします。その方とのご関係は以下のうち、どれにあてはまりますか

|       | 一般 | WS参加者 |
|-------|----|-------|
| 子     | 94 | 24    |
| 孫     | 13 | 3     |
| 兄弟・姉妹 | 2  | 3     |
| 甥・姪   | 0  | 1     |
| その他   | 7  | 0     |

あなたの現在のお住まいの形態は、次のどれに当てはまりますか

|       | 一戸建て<br>(自己所有) | 一戸建て<br>(賃貸) | 集合住宅<br>(自己所有) | 集合住宅<br>(賃貸) | その他  | 合計     |
|-------|----------------|--------------|----------------|--------------|------|--------|
| 一般    | 191            | 11           | 98             | 146          | 10   | 456    |
| %     | 41.9%          | 2.4%         | 21.5%          | 32.0%        | 2.2% | 100.0% |
| WS参加者 | 47             | 1            | 24             | 30           | 1    | 103    |
| %     | 45.6%          | 1.0%         | 23.3%          | 29.1%        | 1.0% | 100.0% |

あなたの家から最寄りの交通機関の駅・停留所までは何分かかりますか

|       | 2,3分以内 | 5分    | 5～10分 | 10～15分 | 15分以上 | 合計     |
|-------|--------|-------|-------|--------|-------|--------|
| 一般    | 113    | 126   | 144   | 56     | 16    | 455    |
| %     | 24.8%  | 27.7% | 31.6% | 12.3%  | 3.5%  | 100.0% |
| WS参加者 | 29     | 28    | 33    | 9      | 4     | 103    |
| %     | 28.2%  | 27.2% | 32.0% | 8.7%   | 3.9%  | 100.0% |

あなたは札幌市に住むようになって何年になりますか

|       | 1年以下 | 10年未満 | 20年未満 | 30年未満 | 40年未満 | 50年未満 | 60年未満 | 60年以上 | 合計     |
|-------|------|-------|-------|-------|-------|-------|-------|-------|--------|
| 一般    | 19   | 53    | 65    | 76    | 78    | 73    | 50    | 37    | 451    |
| %     | 4.2% | 11.8% | 14.4% | 16.9% | 17.3% | 16.2% | 11.1% | 8.2%  | 100.0% |
| WS参加者 | 2    | 20    | 15    | 29    | 16    | 9     | 2     | 8     | 101    |
| %     | 2.0% | 19.8% | 14.9% | 28.7% | 15.8% | 8.9%  | 2.0%  | 7.9%  | 100.0% |
